# Supplementary material for: Heterologous Production of the Marine Myxobacterial Antibiotic Haliangicin and Its Unnatural Analogues Generated by Engineering of the Biochemical Pathway
Source: PubMed Central journal article supplement (PMC4768178; doi:10.1038/srep22091), 2016-02-26
Supplement: srep22091-s1.pdf [file srep22091-s1.pdf]

## Supplementary Information

### Heterologous Production of the Marine Myxobacterial Antibiotic Haliangicin and Its Unnatural Analogues Generated by Engineering of the Biochemical Pathway

Yuwei Sun<sup>1</sup>, Zhiyang Feng<sup>1,†</sup>, Tomohiko Tomura<sup>1</sup>, Akira Suzuki<sup>1</sup>, Seishi Miyano<sup>1</sup>, Takashi Tsuge<sup>1</sup>, Hitoshi Mori<sup>1</sup>, Joo-Won Suh<sup>2</sup>, Takashi Iizuka<sup>3</sup>, Ryosuke Fudou<sup>4</sup>, and Makoto Ojika<sup>1,\*</sup>

<sup>1</sup> Graduate School of Bioagricultural Sciences, Nagoya University, Furo-cho, Chikusa-ku, Nagoya 464-8601, Japan

<sup>2</sup> Department of Biological Sciences, Myongji University, Yongin, Gyunggido 449-728, Korea

<sup>3</sup> Institute for Innovation, Ajinomoto Co., Inc., Kawasaki, Kanagawa 210-8681, Japan

<sup>4</sup> R&D Planning Department, Ajinomoto Co., Inc., Chuo-ku, Tokyo 104-8315, Japan

\* Corresponding author

Tel.: (+81) 52-789-4116. E-mail: ojika@agr.nagoya-u.ac.jp

† Present address: College of Food Science and Technology, Nanjing Agricultural University, Weigang, Nanjing 210095, China

## Table of Contents

|                                                                                                                             |          |
|-----------------------------------------------------------------------------------------------------------------------------|----------|
| <b>Supplementary Methods</b> .....                                                                                          | <b>4</b> |
| $\lambda$ -Red recombineering of cosmids c7-6E and c10-11C .....                                                            | 4        |
| Heterologous production of haliangicin in <i>M. xanthus</i> c10-11C/c7-6E.....                                              | 4        |
| Chemical synthesis of <i>S</i> -Acyl- <i>N</i> -acetylcysteamine (SNAC) derivatives.....                                    | 4        |
| Bioconversion of ( <i>E</i> )-2-methylpent-2-enoyl SNAC (2a) and ( <i>E</i> )-2-pentenoyl SNAC (2b).....                    | 5        |
| Isolation of unnatural haliangicin analogs from gene-disrupted mutants of <i>M. xanthus</i> . ....                          | 6        |
| Methyl esterification of <i>M. xanthus</i> $\Delta hliD$ extracts. ....                                                     | 7        |
| Bioassay methods .....                                                                                                      | 7        |
| <b>Supplementary Figures</b> .....                                                                                          | <b>8</b> |
| Figure S1. Sequences of HKS1 and HKS2 used for screening cosmid library. ....                                               | 8        |
| Figure S2. Cosmids harboring <i>hli</i> genes. ....                                                                         | 9        |
| Figure S3. Modification of c7-6E and c10-11C via $\lambda$ -Red recombineering.....                                         | 9        |
| Figure S4. Restriction analysis and PCR examination of two modified cosmids.....                                            | 10       |
| Figure S5. Integration of c6-7E TA-Kan <sup>R</sup> and c10-11C Tet <sup>R</sup> into <i>M. xanthus</i> . ....              | 11       |
| Figure S6. PCR confirmation of the integration of c7-6E TA-Kan <sup>R</sup> into the chromosome of <i>M. xanthus</i> . .... | 11       |
| Figure S7. PCR confirmation of the integration of c10-11C Tet <sup>R</sup> into the chromosome of <i>M. xanthus</i> . ....  | 12       |
| Figure S8. Heterologous haliangicin production profile in <i>M. xanthus</i> . ....                                          | 12       |
| Figure S9. Feeding experiments with labeled precursors.....                                                                 | 13       |
| Figure S10. Phylogenetic analysis of KS domains in <i>hli</i> genes .....                                                   | 15       |
| Figure S11. Proposed starter biosynthesis of haliangicin .....                                                              | 16       |
| Figure S12. The putative diketide synthases for the biosynthetic formation of the starters.....                             | 17       |
| Figure S13. Proposed $\beta$ -methyl branching biochemistry in haliangicin biosynthesis. ....                               | 18       |
| Figure S14. Proposed biosynthetic pathway of methoxymalony-ACP in haliangicin biosynthesis.....                             | 18       |
| Figure S15. Inactivation of HliR (acyl-CoA dehydrogenase).....                                                              | 19       |
| Figure S16. Inactivation of HliD ( <i>O</i> -methyltransferase). ....                                                       | 20       |
| Figure S17. Methyl esterification of <i>M. xanthus</i> $\Delta hliD$ extracts using TMS diazomethane. ....                  | 22       |
| Figure S18. Inactivation of HliU (epoxidase). ....                                                                          | 23       |

|                                                                                   |           |
|-----------------------------------------------------------------------------------|-----------|
| Figure S19. Expression and purification of recombinant HliR.....                  | 24        |
| Figure S20. <i>In vitro</i> enzymatic reaction of recombinant HliR. ....          | 24        |
| Figure S21. Spectra of 14,15-dihydrohaliangicin (4). ....                         | 27        |
| Figure S22. Spectra of 12,13-deoxyhaliangicin (7).....                            | 30        |
| Figure S23. NMR spectra of haliangicin (1).....                                   | 33        |
| Figure S24. NMR spectra of 2-methylpent-2,4-dienoyl SNAC (3a).....                | 34        |
| Figure S25. NMR spectra of pent-2,4-dienoyl SNAC (3b). ....                       | 35        |
| Figure S26. Biological activities .....                                           | 36        |
| <b>Supplementary Tables .....</b>                                                 | <b>37</b> |
| Table S1. PKS in <i>hli</i> for the biosynthesis of haliangicin skeleton.....     | 37        |
| Table S2. $\beta$ -methyl branching cassette in <i>hli</i> and its homology. .... | 37        |
| Table S3. Methoxymalony-ACP cassette in <i>hli</i> and its homology. ....         | 37        |
| Table S4. Bacterial strains used in this study.....                               | 38        |
| Table S5. Vectors used in this study.....                                         | 39        |
| Table S6. Primers used in this study.....                                         | 40        |
| Table S7. Analysis of end sequences of five cosmids that contain KS domains.....  | 41        |
| Table S8. NMR data for unnatural haliangicin analogs in CDCl <sub>3</sub> . ....  | 41        |
| <b>References.....</b>                                                            | <b>42</b> |

## Supplementary Methods

### $\lambda$ -Red recombineering of cosmids c7-6E and c10-11C

All techniques concerning  $\lambda$ -Red recombineering were described in the published protocol.<sup>1</sup> The gene cassette "TA-Kan<sup>R</sup>" was first prepared by PCR with primers blaF-TAf/blaR-kan1 from plasmid pTA-Kan<sup>R</sup>, which was constructed in advance by cloning of TA fragment (a 1.8-kbp internal fragment amplified with primers TAf/Tar from myxovirescin A biosynthetic gene *Ta-1* of *M. xanthus*<sup>2</sup>) into pGEM-T Easy vector (Promega, Madison, WI) followed by infusion of kanamycin resistance gene *Kan*<sup>R</sup> [amplified with primers PstI-Kan1/SpeI-Kan2 from pCR 2.1 TOPO vector (Life Technologies, U.S.)] into the TA-containing vector. The ampicillin resistance gene (*Amp*<sup>R</sup>) in cosmid c7-6E was then replaced with the cassette TA-Kan<sup>R</sup> by  $\lambda$ -Red recombineering, resulting in the modified cosmid named c7-6E TA-Kan<sup>R</sup> (Supplementary Fig. S3a). Cosmid c10-11C was also modified in a similar way, in which *Amp*<sup>R</sup> was replaced by tetracycline resistance gene (*Tet*<sup>R</sup>) [amplified with primers blaF-tetU/blaR-tetD from *E. coli* YM297 genome (NBRP, Japan)], generating the modified cosmid c10-11C Tet<sup>R</sup> (Supplementary Fig. S3b). The two modified cosmids were confirmed by PCR and restriction analysis (Supplementary Fig. S4).

### Heterologous production of haliangicin in *M. xanthus* c10-11C/c7-6E.

Four clones of *M. xanthus* c10-11C/c7-6E were randomly selected and cultivated in 50 mL CTT medium (oxytetracycline 12.5  $\mu$ g/mL) supplemented with 2% (w/v) SEPABEADS SP207 absorber resin at 30 °C. The cells and resin were harvested from 4 days culture broth by centrifugation (6000 rpm, 5 min) and extracted with MeOH (50 mL  $\times$  2) at 30 °C for 30 min. After filtration, the combined filtrate were concentrated *in vacuo* and extracted with EtOAc (50 mL  $\times$  3). The EtOAc extracts were combined and washed with H<sub>2</sub>O (30 mL) and dried to afford a yellow oil. The cultures of *M. xanthus* ATCC25232 (wild type) and *H. ochraceum* (native haliangicin producer) were extracted in the same way. A sample of 0.5 mL broth eq. from each extract was subjected to HPLC analysis [Develosil ODS-UG-5 column ( $\phi$  4.6  $\times$  250 mm, Nomura Chemical Ltd.), linear gradient elution of 30% to 100% (40 min) methanol in H<sub>2</sub>O, flow rate of 1 mL/min, detected at 290 nm]. HPLC profiles are shown in Fig. 3.

### Chemical synthesis of S-Acyl-N-acetylcysteamine (SNAC) derivatives.

To a solution of 1-ethyl-3-(3-dimethylaminopropyl)carbodiimide hydrochloride (1.5 eq) and 4-dimethylaminopyridine (0.1 eq) in anhydrous dichloromethane was added the appropriate acids (1.2 ~ 1.5 eq) and *N*-acetylcysteamine (1 eq). The reaction mixture was stirred under nitrogen at room temperature overnight, then diluted with dichloromethane and washed with H<sub>2</sub>O. The organic layer was dried, concentrated *in vacuo*, and purified by silica gel chromatography to afford the pure thioester products.

**(E)-2-methyl-2-pentenoyl SNAC (2a):** colorless oil, <sup>1</sup>H NMR (CDCl<sub>3</sub>, 400 MHz)  $\delta$  6.73 (qt, *J* = 1.0, 7.3 Hz, 1H), 6.07 (brs, 1H), 3.42 (q, *J* = 6.1 Hz, 2H), 3.04 (t, *J* = 6.4 Hz, 2H), 2.23 (m, 2H), 1.95 (s, 3H), 1.85 (d, *J* = 1.0 Hz, 3H), 1.08 (t, *J* = 7.6 Hz, 3H). ESI-MS *m/z* 216.1 [M+H]<sup>+</sup>, 238.1 [M+Na]<sup>+</sup>.

**(E)-2-pentenoyl SNAC (2b):** colorless oil, <sup>1</sup>H NMR (CDCl<sub>3</sub>, 400 MHz):  $\delta$  6.96 (dt, *J* = 15.6, 6.4 Hz, 1H), 6.10 (d, *J* = 15.6 Hz, 1H), 6.08 (br, 1H), 3.42 (q, *J* = 6.0 Hz, 2H), 3.07 (t, *J* = 6.4 Hz, 2H), 2.22 (m, 1H), 1.94 (s, 3H), 1.06 (t, *J* = 7.2 Hz, 3H).

**propionyl SNAC:** colorless oil,  $^1\text{H NMR}$  ( $\text{CDCl}_3$ , 400 MHz)  $\delta$  5.99 (br, 1H), 3.41 (q,  $J = 6.2$  Hz, 2H), 3.01 (t,  $J = 6.5$  Hz, 2H), 2.58 (q,  $J = 7.5$  Hz, 2H), 1.95 (s, 3H), 1.17 (t,  $J = 7.4$  Hz, 3H).

**acryloyl SNAC:** colorless oil,  $^1\text{H NMR}$  ( $\text{CDCl}_3$ , 400 MHz)  $\delta$  6.34 (m, 2H), 6.01 (br, 1H), 5.72 (dd,  $J = 9.6, 1.6$  Hz, 1H), 3.46 (q,  $J = 6.2$  Hz, 2H), 3.12 (t,  $J = 6.4$  Hz, 2H), 1.96 (s, 3H).

**butyryl SNAC:** colorless oil,  $^1\text{H NMR}$  ( $\text{CDCl}_3$ , 400 MHz):  $\delta$  6.18 (br, 1H), 3.38 (q,  $J = 6.4$  Hz, 2H), 2.98 (t,  $J = 6.4$  Hz, 2H), 2.51 (t,  $J = 7.6$  Hz, 2H), 1.92 (s, 3H), 1.65 (m, 2H), 0.91 (t,  $J = 7.6$  Hz, 3H).

**valeryl SNAC:** colorless oil,  $^1\text{H NMR}$  ( $\text{CDCl}_3$ , 400 MHz):  $\delta$  6.02 (br, 1H), 3.40 (q,  $J = 6.0$  Hz, 2H), 3.00 (t,  $J = 6.4$  Hz, 2H), 2.55 (t,  $J = 7.6$  Hz, 2H), 1.94 (s, 3H), 1.62 (m, 2H), 1.33 (m, 2H), 0.89 (t,  $J = 7.2$  Hz, 3H).

**hexanoyl SNAC:** colorless oil,  $^1\text{H NMR}$  ( $\text{CDCl}_3$ , 400 MHz):  $\delta$  6.17 (br, 1H), 3.39 (q,  $J = 6.0$  Hz, 2H), 2.98 (t,  $J = 6.4$  Hz, 2H), 2.53 (t,  $J = 7.6$  Hz, 2H), 1.93 (s, 3H), 1.62 (m, 2H), 1.27 (m, 4H), 0.85 (t,  $J = 6.8$  Hz, 3H).

**heptanoyl SNAC:** colorless oil,  $^1\text{H NMR}$  ( $\text{CDCl}_3$ , 400 MHz):  $\delta$  6.29 (br, 1H), 3.36 (q,  $J = 6.4$  Hz, 2H), 2.97 (t,  $J = 6.4$  Hz, 2H), 2.51 (t,  $J = 7.2$  Hz, 2H), 1.92 (s, 3H), 1.59 (m, 2H), 1.25 (m, 6H), 0.82 (t,  $J = 6.8$  Hz, 3H).

**2-methylvaleryl SNAC:** colorless oil,  $^1\text{H NMR}$  ( $\text{CDCl}_3$ , 400 MHz):  $\delta$  5.90 (br, 1H), 3.42 (q,  $J = 6.0$  Hz, 2H), 3.00 (t,  $J = 6.4$  Hz, 2H), 2.66 (m, 1H), 1.95 (s, 3H), 1.68 (m, 1H), 1.37 (m, 3H), 1.16 (d,  $J = 6.8$  Hz, 3H), 0.89 (t,  $J = 7.2$  Hz, 3H).

**4-methylvaleryl SNAC:** colorless oil,  $^1\text{H NMR}$  ( $\text{CDCl}_3$ , 400 MHz):  $\delta$  6.17 (br, 1H), 3.38 (q,  $J = 6.4$  Hz, 2H), 2.98 (t,  $J = 6.4$  Hz, 2H), 2.53 (t,  $J = 7.6$  Hz, 2H), 1.93 (s, 3H), 1.52 (m, 3H), 0.86 (d,  $J = 6.4$  Hz, 6H).

**2-hexenoyl SNAC:** colorless oil,  $^1\text{H NMR}$  ( $\text{CDCl}_3$ , 400 MHz):  $\delta$  6.89 (dt,  $J = 15.6, 7.2$  Hz, 1H), 6.16 (br, 1H), 6.10 (d,  $J = 15.2$  Hz), 3.43 (q,  $J = 6.0$  Hz, 2H), 3.06 (t,  $J = 6.4$  Hz, 2H), 2.16 (q,  $J = 7.2, 2\text{H}$ ), 1.94 (s, 3H), 1.47 (m, 2H), 0.91 (t,  $J = 7.2$  Hz, 3H).

**4-methyl-2-pentenoyl SNAC:** colorless oil,  $^1\text{H NMR}$  ( $\text{CDCl}_3$ , 400 MHz):  $\delta$  6.87 (dd,  $J = 15.6, 6.8$  Hz, 1H), 6.16 (br, 1H), 6.04 (d,  $J = 15.6$  Hz, 1H), 3.42 (q,  $J = 6.4$  Hz, 2H), 3.06 (t,  $J = 6.4$  Hz, 2H), 2.44 (m, 1H), 1.94 (s, 3H), 1.05 (d,  $J = 6.8$  Hz, 6H).

**cyclopent-1-enoyl SNAC:** white needles,  $^1\text{H NMR}$  ( $\text{CDCl}_3$ , 400 MHz):  $\delta$  6.81 (m, 1H), 6.24 (br, 1H), 3.40 (q,  $J = 6.4$  Hz, 2H), 3.04 (t,  $J = 6.4$  Hz, 2H), 2.53 (m, 4H), 1.94 (m, 2H), 1.93 (s, 3H).

**cyclohex-1-enoyl SNAC:** white needles,  $^1\text{H NMR}$  ( $\text{CDCl}_3$ , 400 MHz):  $\delta$  6.98 (m, 1H), 6.11 (br, 1H), 3.41 (q,  $J = 6.4$  Hz, 2H), 3.03 (t,  $J = 6.4$  Hz, 2H), 2.23 (m, 4H), 1.93 (s, 3H), 1.61 (m, 4H).

**2-methyl-4-pentenoyl SNAC:** Colorless oil,  $^1\text{H NMR}$  ( $\text{CDCl}_3$ , 400 MHz):  $\delta$  5.91 (br, 1H), 5.70 (m, 1H), 5.05 (m, 2H), 3.41 (q,  $J = 6.4$  Hz, 2H), 3.01 (t,  $J = 6.4$  Hz, 2H), 2.73 (q,  $J = 6.8$  Hz, 1H), 2.44 (m, 1H), 2.17 (m, 1H), 1.94 (s, 3H), 1.17 (d,  $J = 6.8$  Hz, 3H)

**4-pentenoyl SNAC:** Colorless oil,  $^1\text{H NMR}$  ( $\text{CDCl}_3$ , 400 MHz):  $\delta$  6.09 (br, 1H), 5.76 (m, 1H), 5.02 (m, 2H), 3.39 (q,  $J = 6.0$  Hz, 2H), 3.00 (t,  $J = 6.4$  Hz, 2H), 2.65 (t,  $J = 7.6$  Hz, 2H), 2.38 (dt,  $J = 7.2, 6.6$  Hz, 2H), 1.94 (s, 3H)

### **Bioconversion of (*E*)-2-methylpent-2-enoyl SNAC (2a) and (*E*)-2-pentenoyl SNAC (2b).**

The HliR-overexpressing host *E. coli* KRX pET32a-HliR was cultured in five 50 mL of LB mediums for 2 days. To each 50 mL culture, (*E*)-2-methylpent-2-enoyl SNAC (**2a**, 2.7 mg in 125  $\mu\text{L}$  EtOH) or (*E*)-2-pentenoyl SNAC (**2b**, 5 mg in 125  $\mu\text{L}$  EtOH) was added twice at 6 h and 16 h after the induction was started. When the second portion was added, the cultures were

transferred to 30 °C and incubated for additional 24 h. The cultures were centrifuged (6000 rpm, 5 min) and cell pellets were extracted with methanol (30 mL × 2) and the supernatants were extracted with EtOAc (50 mL × 3). The methanol extracts and EtOAc layer were combined and concentrated. The resulting residue was further subjected to silica gel column chromatography [5 g of silica gel, eluted with hexane/EtOAc (1/1, v/v)] to yield **3a** (2-methylpent-2,4-dienoyl SNAC, 2.6 mg): colorless oil; UV (MeOH)  $\lambda_{\max}$  257 ( $\epsilon$  17,000), 205 ( $\epsilon$  11,000), 282 (sh,  $\epsilon$  12,000) nm; IR (film)  $\nu_{\max}$  3289, 2922, 1654, 1542, 1457, 1376, 1288, 983  $\text{cm}^{-1}$ ;  $^1\text{H}$  NMR ( $\text{CDCl}_3$ , 400 MHz)  $\delta$  7.15 (d,  $J$  = 11.2 Hz, 1H), 6.68 (ddd,  $J$  = 10.0, 10.8, 16.4 Hz, 1H), 5.88 (brs, 1H), 5.65 (d,  $J$  = 16.4 Hz, 1H), 5.55 (d,  $J$  = 10.0 Hz, 1H), 3.47 (q,  $J$  = 6.4 Hz, 2H), 3.10 (t,  $J$  = 6.4 Hz, 2H), 2.00 (d,  $J$  = 1.2 Hz, 3H), 1.97 (s, 3H);  $^{13}\text{C}$  NMR ( $\text{CDCl}_3$ , 100 MHz):  $\delta$  193.9, 170.3, 137.5, 135.3, 131.8, 125.8, 39.8, 28.5, 23.3, 12.7; HRMS calcd. for  $\text{C}_{10}\text{H}_{15}\text{NO}_2\text{NaS}$  236.0716; found  $m/z$  236.0720  $[\text{M}+\text{Na}]^+$ . **3b** (pent-2,4-dienoyl SNAC, 4.1 mg): colorless oil; UV (MeOH)  $\lambda_{\max}$  262 ( $\epsilon$  22,000), 204 ( $\epsilon$  9,600) nm; IR (film)  $\nu_{\max}$  3288, 3081, 2930, 1656, 1591, 1550, 1289, 1254, 1181, 1121, 1032, 811  $\text{cm}^{-1}$ ;  $^1\text{H}$  NMR ( $\text{CDCl}_3$ , 400 MHz):  $\delta$  7.21 (dd,  $J$  = 15.2, 10.8 Hz, 1H), 6.43 (ddd,  $J$  = 16.8, 10.4, 10.4 Hz, 1H), 6.20 (d,  $J$  = 15.2 Hz, 1H), 5.92 (br, 1H), 5.70 (d,  $J$  = 17.2 Hz, 1H), 5.60 (d,  $J$  = 9.6 Hz, 1H), 3.47 (dt,  $J$  = 6.4, 6.0 Hz, 2H), 3.12 (t,  $J$  = 6.4 Hz, 2H), 1.96 (s, 3H);  $^{13}\text{C}$  NMR ( $\text{CDCl}_3$ , 100 MHz):  $\delta$  190.4, 170.3, 141.3, 134.4, 128.5, 127.6, 39.8, 28.4, 23.2; HRMS calcd. for  $\text{C}_9\text{H}_{13}\text{NO}_2\text{NaS}$  222.0559; found  $m/z$  222.0563  $[\text{M}+\text{Na}]^+$ .

#### Isolation of unnatural haliangicin analogs from gene-disrupted mutants of *M. xanthus*.

A gene-disrupted mutant *M. xanthus*  $\Delta hliR$  or *M. xanthus*  $\Delta hliU$  was cultured in 3 L or 1 L of production medium supplemented with 4% (w/v) SEPABEADS SP207 absorber resin, 0.1% trace elements solution and 200 mM sodium acetate at 30 °C in a similar way to *M. xanthus* c10-11C/c7-6E. An extract (646 mg) obtained from the cultures (3 L in total) of *M. xanthus*  $\Delta hliR$  was separated by flash column chromatography [Hi-flash L size (Yamazen, Kyoyo, Japan), flow rate 12 mL/min, linear gradient of 0% → 20% EtOAc in hexane in 40 min] using a gradient system equipped with a Pump Module C-605 and a Pump Manager C-615 (BÜCHI, Switzerland). The fraction (99.3 mg) eluted at 27~40 min was subjected to preparative HPLC [Develosil ODS-UG-5 ( $\phi$  20 × 250 mm), Nomura Chemical Ltd.; detected at 340 nm, 75% MeOH in water, 10 mL/min] to yield 14,15-dihydrohaliangicin (**4**, 16.4 mg,  $t_R$  42~46 min). An extract (358 mg) from the cultures (1 L in total) of *M. xanthus*  $\Delta hliU$  was purified by flash column chromatography (Hi-flash M size, flow rate 6 mL/min, linear gradient of 0% → 15% EtOAc in hexane in 30 min). The fraction (22.3 mg) eluted at 18~26 min was subjected to preparative HPLC [Develosil ODS-UG-5 ( $\phi$  20 × 250 mm).; detected at 340 nm, 85% MeOH, 10 mL/min] to yield 12,13-deoxylhaliangicin (**7**, 6.4 mg,  $t_R$  25.5~ 28 min). **14,15-dihydrohaliangicin (4)**: light yellow oil,  $[\alpha]_D^{25}$  +27.4 (c 0.164, MeOH); UV (MeOH)  $\lambda_{\max}$  246 ( $\epsilon$  11,600) nm; IR (film)  $\nu_{\max}$  1721, 1614, 1266, 1196, 1143, 1055, 977, 924, 897 and 824  $\text{cm}^{-1}$ ; HRMS calcd. for  $\text{C}_{22}\text{H}_{34}\text{O}_5\text{Na}$ : 401.2299; found  $m/z$  401.2298  $[\text{M}+\text{Na}]^+$ . For NMR data, see Supplementary Fig. S21 and Table S8. **12,13-deoxylhaliangicin (7)**: light yellow oil,  $[\alpha]_D^{30}$  +43.1 (c 0.13, MeOH); UV (MeOH)  $\lambda_{\max}$  236 ( $\epsilon$  15,500) nm; IR (film)  $\nu_{\max}$  1721, 1672, 1649, 1614, 1265, 1197, 1143, 1054, 977, 924, 827 and 755  $\text{cm}^{-1}$ ; HRMS calcd. for  $\text{C}_{22}\text{H}_{32}\text{O}_4\text{Na}$  383.2193; found  $m/z$  383.2206  $[\text{M}+\text{Na}]^+$ . For NMR spectroscopic data, see Supplementary Fig. S22 and Table S8.

### **Methyl esterification of *M. xanthus* $\Delta$ hliD extracts.**

An ethyl acetate extract (121 mg) obtained from 500 mL of *M. xanthus*  $\Delta$ hliD cultures was dissolved in Et<sub>2</sub>O (5 mL) and 400  $\mu$ L of trimethylsilyldiazomethane solution (2.0 M in Et<sub>2</sub>O) was added. After stirring at room temperature for 30 min, the reaction mixture was dried under nitrogen flash and the residue was analyzed by HPLC (Develosil ODS-UG-5,  $\phi$  4.6  $\times$  250 mm, 1 mL/min, detected at 290 nm, 20  $\rightarrow$  100% methanol in H<sub>2</sub>O in 40 min) (Supplementary Fig. S17). The mixture was chromatographed by the same method as that for haliangicin (**1**) and 12,13-deoxyhaliangicin (**7**) to yield haliangicin (**1**, 1.0 mg) and 12,13-deoxyhaliangicin (**7**, 0.7 mg).

### **Bioassay methods**

(1) Anti-oomycete activity (See Supplementary Fig. S26a for results)

The phytopathogenic oomycete *Phytophthora capsici* NBRC 30696, purchased from NITE-Biological Resource Center (NBRC, Chiba, Japan), was cultured on a potato-agar medium [in 1 L, potato broth from 200 g of fresh potato, glucose (20 g), and agar (20 g)] in a 9-cm dish at 25 °C for 7 days in the dark. A piece of the colony was then inoculated on the center of a 5% V8-agar medium [V8 vegetable juice (5 mL), agar (1.5 g), and water (95 mL)] in a 9-cm dish and incubated at 25 °C for 48 h in the dark until the colony grew to approximately 3–4 cm in diameter. A paper disc (6 mm in diameter) impregnated with a sample was placed 1 cm away from the front of the colony. After incubating for 22–24 h, the distance between the edge of the colony and the paper disc (control: 0 mm) was measured. The activity was defined as a minimum dose that induced a definite distance (0.5 mm or wider) between the colony and the disk.

(2) MIC assay

The microorganisms, *Candida rugosa* AJ 14513, *Bacillus subtilis* AJ 12865, and *Escherichia coli* AJ 3837, were provided by the Institute for Innovation, Ajinomoto Co., Inc. (Kanagawa, Japan). The protocols used for the assay are in the followings. For *B. subtilis* and *E. coli*, see *Methods for Dilution Antimicrobial Susceptibility Tests for Bacteria That Grow Aerobically; Approved Standard—Ninth Edition*. CLSI document M07-A9 [ISBN 1-56238-783-9], Clinical and Laboratory Standards Institute (Wayne, PA, USA), 2012. For *C. rugosa*, see *Reference Method for Broth Dilution Antifungal Susceptibility Testing of Yeasts; Approved Standard—Second Edition*. NCCLS document M27-A2 [ISBN 1-56238-469-4], NCCLS (Wayne, PA, USA), 2002.

(3) Cytotoxicity assay (See Supplementary Fig. S26b for results)

HeLa-S3 (SC) cells were provided by the RIKEN BRC through the National Bio-Resource Project of the MEXT, Japan. The cells were cultured in Eagle's minimal essential medium (EMEM) (Wako Pure Chemical Industries, Osaka, Japan) supplemented with 10% bovine serum, 100 units/mL penicillin, and 100  $\mu$ g/mL streptomycin (Thermo Fisher Scientific Inc., MA, USA). A total of 10,000 cultured cells were seeded into each well of a 96-well plate containing 99  $\mu$ L of the same medium. After pre-incubation for 24 h at 37 °C in an atmosphere of 5% CO<sub>2</sub>, a compound in 1  $\mu$ L of dimethyl sulfoxide (DMSO) was added to each well, and the cells were incubated an additional 48 h. A solution (10  $\mu$ L) of 3-(4,5-dimethylthiazol-2-yl)-2,5-diphenyltetrazolium bromide (MTT) in phosphate buffer saline (PBS) (5 mg/mL) was then added to each well, and the plate was incubated for an additional 3 h. Subsequently, the medium was removed by aspiration, any generated formazan was dissolved in 100  $\mu$ L of DMSO, and the absorbance was measured at 595 nm using a Multiskan FC microplate reader (Thermo Fisher Scientific).

## Supplementary Figures

**Figure S1. Sequences of HKS1 and HKS2 used for screening cosmid library.**

>HKS1

GCTCGAGGTGGCGTGGGAGGCGCTCGAACACGCGGCCCTGCATCCCGACGAGATCTACGG  
CAGCCAGACCGGCGTGTTCGTAGGCGCGTCCACCACCGACTACGCACAGCGGCAGATCGC  
GTCCGGCACCGCGCCCTATCTCGACAAGTACTTCAGCACCGGCGCGGCCAACTGCTTCTGC  
GCCGGCCGCGTCTCGTACACATTTGGCTTTCAGGGGCCAGCGTGGTCCTCGACACCGCGT  
GCTCGTCCTCGCTCGTCGCCGTTACCTCGCCAGTCAAAGCCTGCGGCGCGGCGAATGCG  
AGATGGCGCTCGCGGGCGGGGTCAACCTCATGTTGTCCCGCTGCTCACCATCTTCACGTC  
CAAAGTGCAGACCATGGCGCCCGACGGCGCGTGCAAGACCTTCGACACGCGCGCCAACGG  
CTTCGTGCGCGCCGAAGGCTGCGGCGTGGTGGTTCTCGAACGACTGTCCACCGCGCTGGC  
CAAGGGCCACACGATCCATGCGCTCATCCGCGGCACGGCGATCAACCAAGATGGCCGCAGC  
AACGGCCTCACCGCGCCCAACGTGGTGCAGCAGCGGGTTCATCGAGCGCGCGCTCGCC  
AATGCCACGTC AATCCCGCGCGTGTACCTACGTCGAGACCCA

>HKS2

GTCGGGGGCCGCGACCTGGGCGCGCTCGAGCGCGCGGCCGATGACGTCCTGCTGGGCGA  
TGCCGCTGGGGGCGGTGAGGCCGTTGGTGTAGCCGTCGTGGTTGAGCGCGGTGCCGCGG  
ATGACGGCGGCCACGGGGTAGCCGGCGGCGATGGCGTCGGACAGCCGGGCGAGGAACAC  
CATGCCGACGCCCTCGGAGCGGACGTAGCCGTTAGCCGAGGCGTCGAAGGTCTTGCAGCG  
GCCGTCGGGCGCCATCATAACGGCCTGGTTGAAGGCGATGGTCAGGTCGGGCGCGAGGAT  
GGCGTTGACGCCACCGGCCAGGGCCAGGTTCGATTCGCCCTCGAGCAGGCTGCGGCAGG  
CGAGGTGCACGGCCGCGAGCGACGACGAGCAGGCGGTGTCCACGGCCATGCTGGGGCCG  
CGCAGGCCGAGCAGGTATGAGATGCGATTGGCCGCGATGCTGTGCGCGTTGCCGGTGCCG  
GCGTGGCGGTTCGAGGCGGGCGGGGTGCCGAACCTGGCGCTGCGCGTAGTCGCTGCTGCT  
GATGCCGACGAAGACCCCGGTGCGCGAATCCTTGAGCGCCGCGGGCTGCTGCCCGGCGC  
GTTCCAGGGTCTCCACACGACCTCGAGGAGCATGCGCTG



### Figure S2. Cosmids harboring *hli* genes.

The cosmids c3-5F, c4-6B, c7-6E, c9-4E, c10-11C overlap each other and cover a region of more than 80 kbp. Characteristic fragments for confirming these cosmid relationships were (1) PKS fragments (red, purple, and blue), (2) an acyl-CoA dehydrogenase fragment homologous to SorD (green), and (3) an HMG-CoA synthase fragment homologous to MupH (orange).

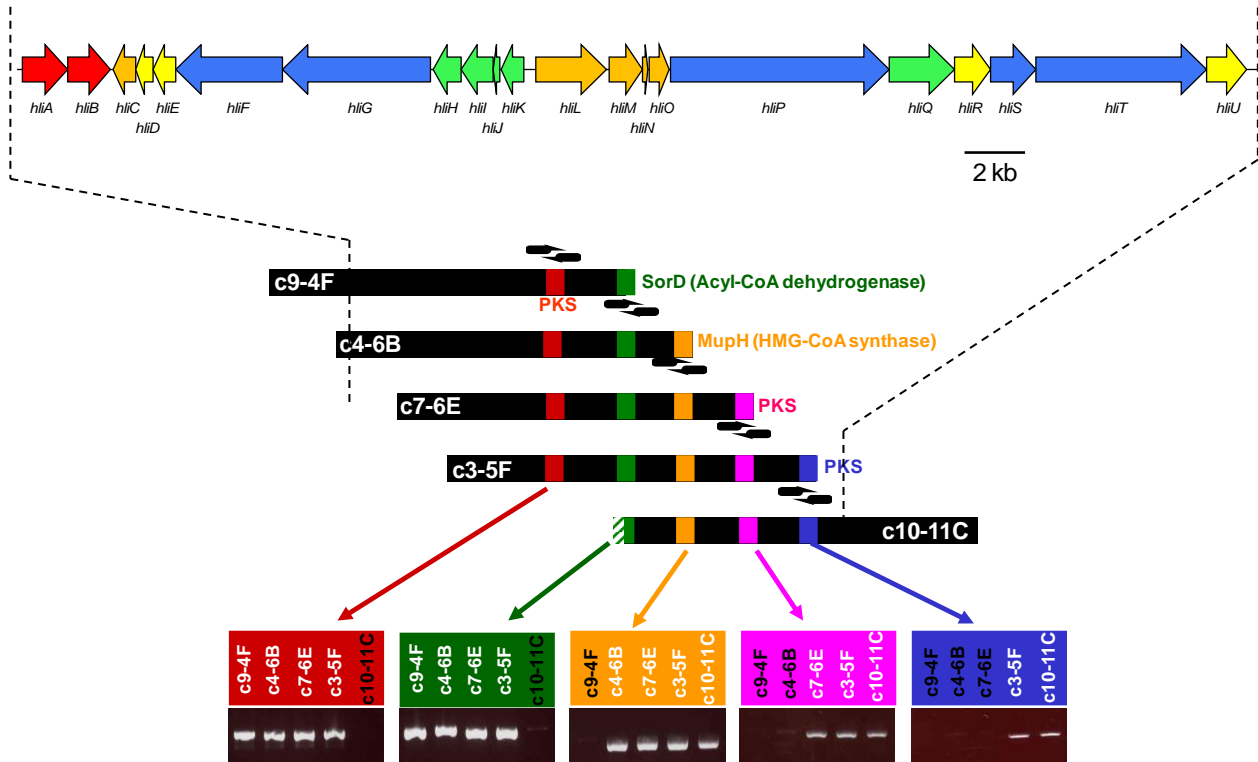

### Figure S3. Modification of c7-6E and c10-11C via $\lambda$ -Red recombineering.

- Construction of c7-6E TA-Kan<sup>R</sup> from c7-6E by replacement of Amp<sup>R</sup> with TA-Kan<sup>R</sup>
- Construction of c10-11C Tet<sup>R</sup> from c10-11C by replacement of Amp<sup>R</sup> with Tet<sup>R</sup>

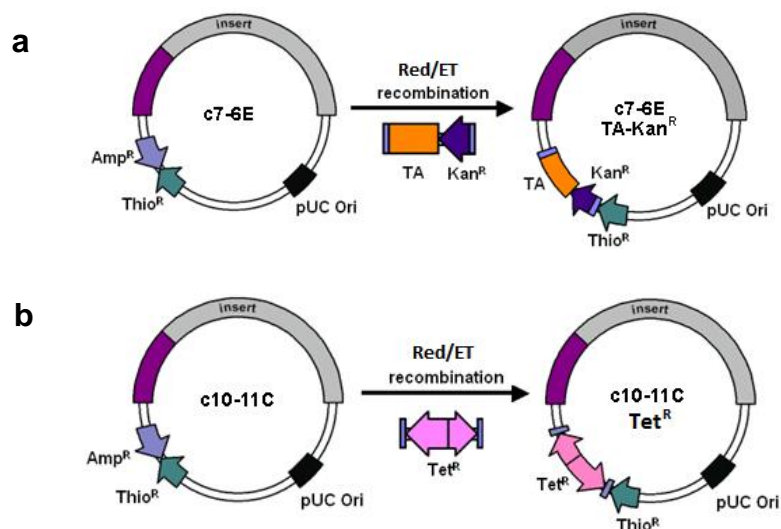

**Figure S4. Restriction analysis and PCR examination of two modified cosmids.**

**a.** Restriction analysis of c7-6E TA-Kan<sup>R</sup> with *EcoRI*/*SalI*/*BamHI*. The intended recombination resulted in increased restriction sites of *SalI* and *BamHI*. The newly generated fragments in *SalI* and *BamHI* digestion are indicated by the red cycles.

**b.** PCR confirmation of c7-6E TA-Kan<sup>R</sup> using primers TAf/thioF.

**c.** Restriction analysis of c10-11C Tet<sup>R</sup> with *EcoRI*. The intended recombination resulted in one increased restriction site of *EcoRI*. The newly generated fragment is indicated by the red cycle.

**d.** PCR confirmation of c10-11C Tet<sup>R</sup> using primers tetU/thioF.

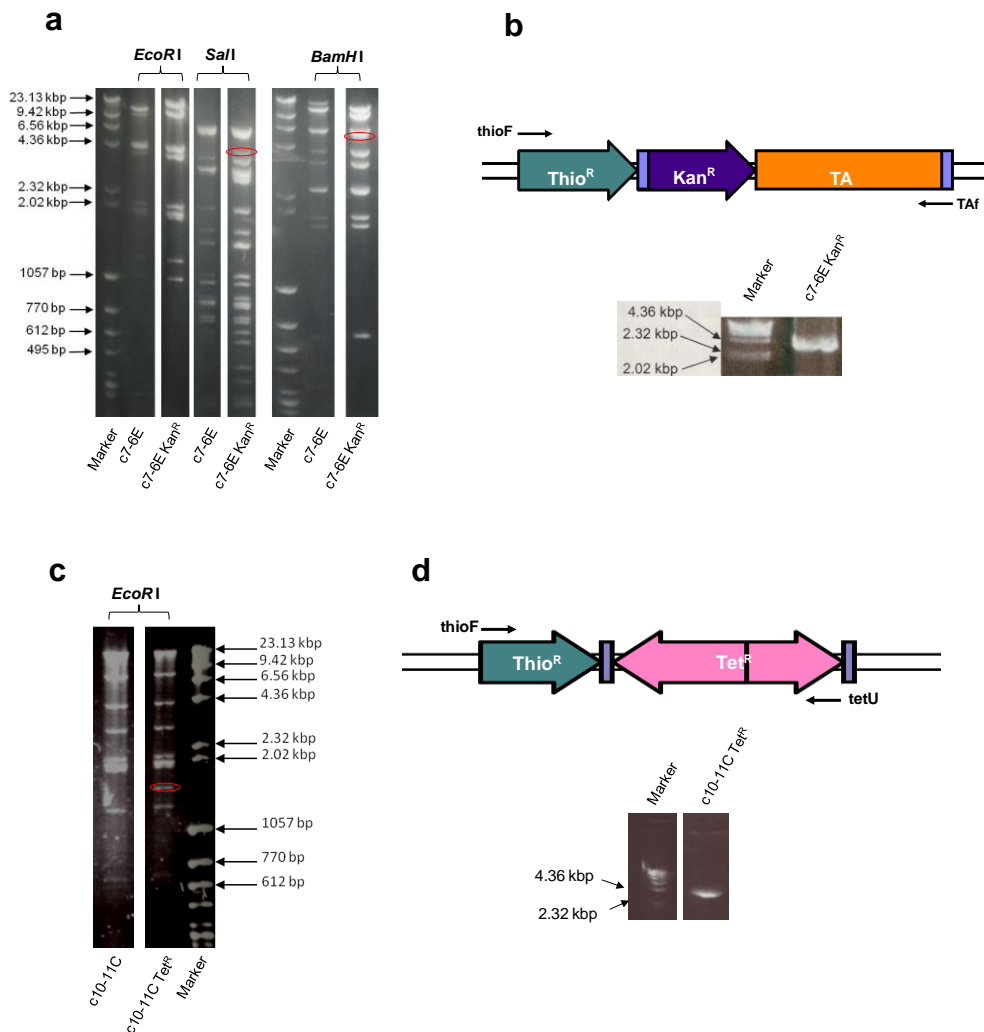

**Figure S5. Integration of c6-7E TA-Kan<sup>R</sup> and c10-11C Tet<sup>R</sup> into *M. xanthus*.**

Two modified cosmids that cover the haliangicin biosynthetic gene clusters (*hli*) were integrated into the chromosome of *M. xanthus* to reconstitute *hli* in *M. xanthus*.

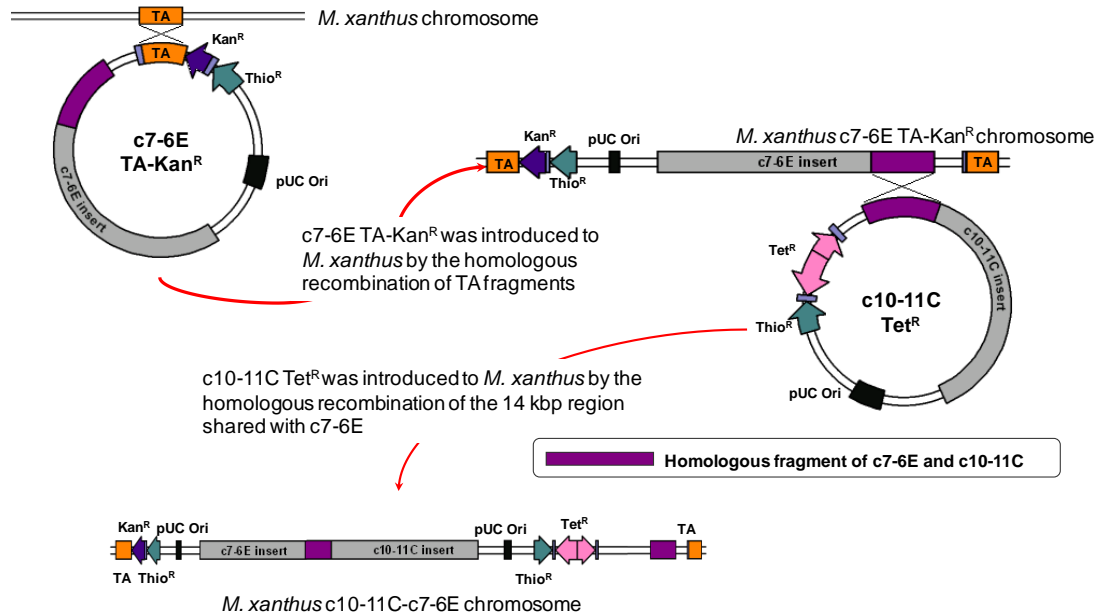

**Figure S6. PCR confirmation of the integration of c7-6E TA-Kan<sup>R</sup> into the chromosome of *M. xanthus*.**

- PCR confirmation of *M. xanthus* c7-6E TA-Kan<sup>R</sup> by primers pair A (HMG-Syn Up/D) and pair B (9-4F-SorD F/R).
- PCR examination of the homologous recombination of TA fragments by primer pair C (blaF/TAr-R) and pair D (TAf-F/Hpal-kan1).

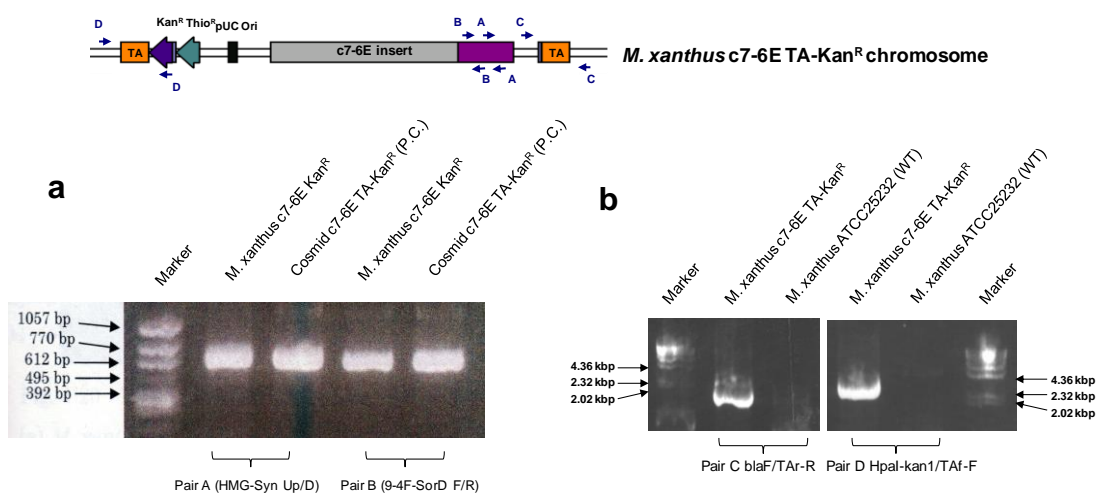

**Figure S7. PCR confirmation of the integration of c10-11C Tet<sup>R</sup> into the chromosome of *M. xanthus*.**

The second integration was confirmed by PCR amplification by primer pair A (HKS4NU/D), pair B (1011R-U/D) and pair C (7-6ENF-F/R)

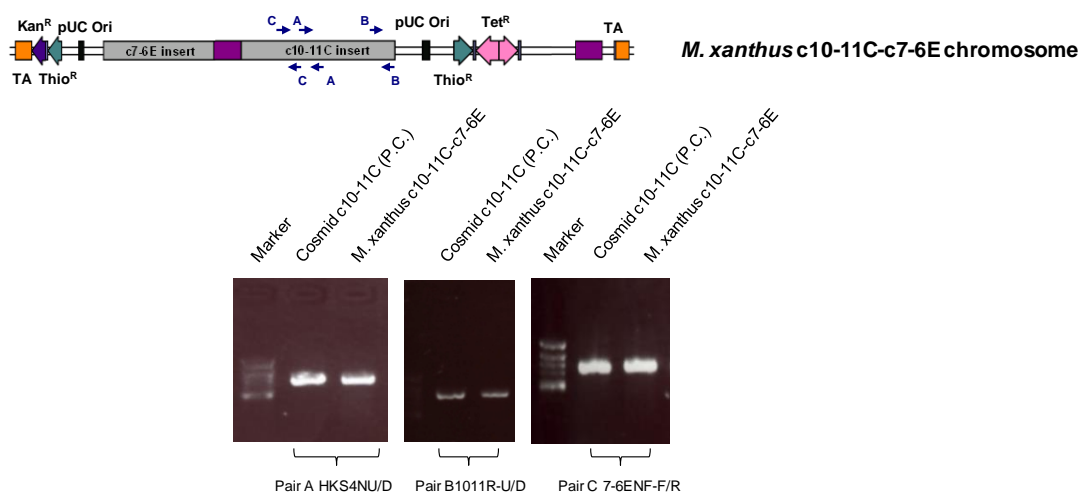

**Figure S8. Heterologous haliangicin production profile in *M. xanthus*.**

Comparison of haliangicin/*cis*-haliangicin production profile in *M. xanthus* and *H. ochraceum*. The separation was achieved by an isocratic elution [MeOH–H<sub>2</sub>O (75:25, v/v), flow rate: 1 mL/min] on a Develosil ODS-UG-5 ( $\phi$  4.6 x 250 mm) column. UV detection was at 290s nm. Haliangicin (**1**) was accompanied by *cis*-haliangicin (12,13-*cis*-epoxy isomer) in a ratio of 3:2 in the native producer *H. ochraceum*,<sup>1</sup> whereas the heterologous host *M. xanthus* c10-11C-c7-6E strain almost solely produced haliangicin (**1**).

**a.** Extracts from *H. ochraceum* (haliangicin and cishaliangicin,  $R_t = 25 \sim 26$  min);

**b.** Extracts from *M. xanthus* c10-11C-c7-6E (haliangicin,  $R_t = 26$  min).

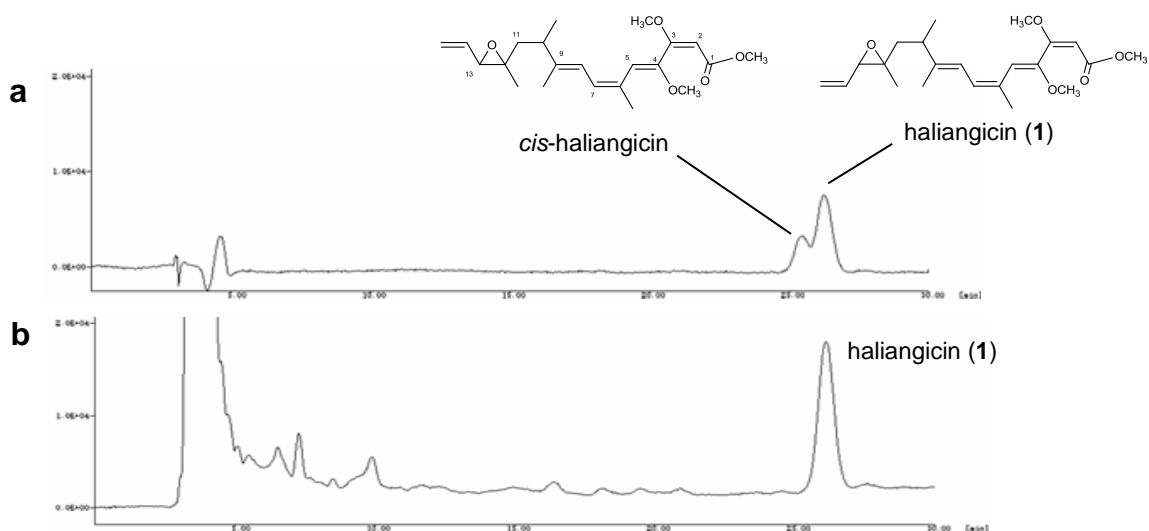

**Figure S9. Feeding experiments with labeled precursors.**

- a.**  $^{13}\text{C}$  NMR spectrum (150 MHz) of [2- $^{13}\text{C}$ ]acetate-labeled haliangicin in  $\text{CDCl}_3$ .  
**b.**  $^{13}\text{C}$  NMR spectrum (150 MHz) of [1,2- $^{13}\text{C}_2$ ]acetate-labeled haliangicin in  $\text{CDCl}_3$ .  
**c.**  $^{13}\text{C}$  NMR spectrum (150 MHz) of [1- $^{13}\text{C}$ ]propionate-labeled haliangicin in  $\text{CDCl}_3$ .  
**d.**  $^{13}\text{C}$  NMR spectrum (150 MHz) of L-[methyl- $^{13}\text{C}$ ]methionine-labeled haliangicin in  $\text{CDCl}_3$ .  
**e.**  $^{13}\text{C}$  NMR spectrum (100 MHz) of [U- $^{13}\text{C}_3$ ]glycerol-labeled haliangicin in  $\text{CDCl}_3$ . The two-carbon unit of C-3 and C-4 with vicinal oxygen atoms was derived neither from acetate nor propionate, but from glycerol.<sup>3-7</sup> [U- $^{13}\text{C}_3$ ]glycerol labeled C-3 and C-4 as doublets due to direct  $^{13}\text{C}$ - $^{13}\text{C}$  coupling. Additional enhancements of acetate-derived carbon signals of C-1~2, C-7~8 and 9-Me might be explained by the metabolism of glycerate via glycolysis that finally reach acetyl-CoA as described in other “glycolate” unit-containing compounds.<sup>4,5</sup>

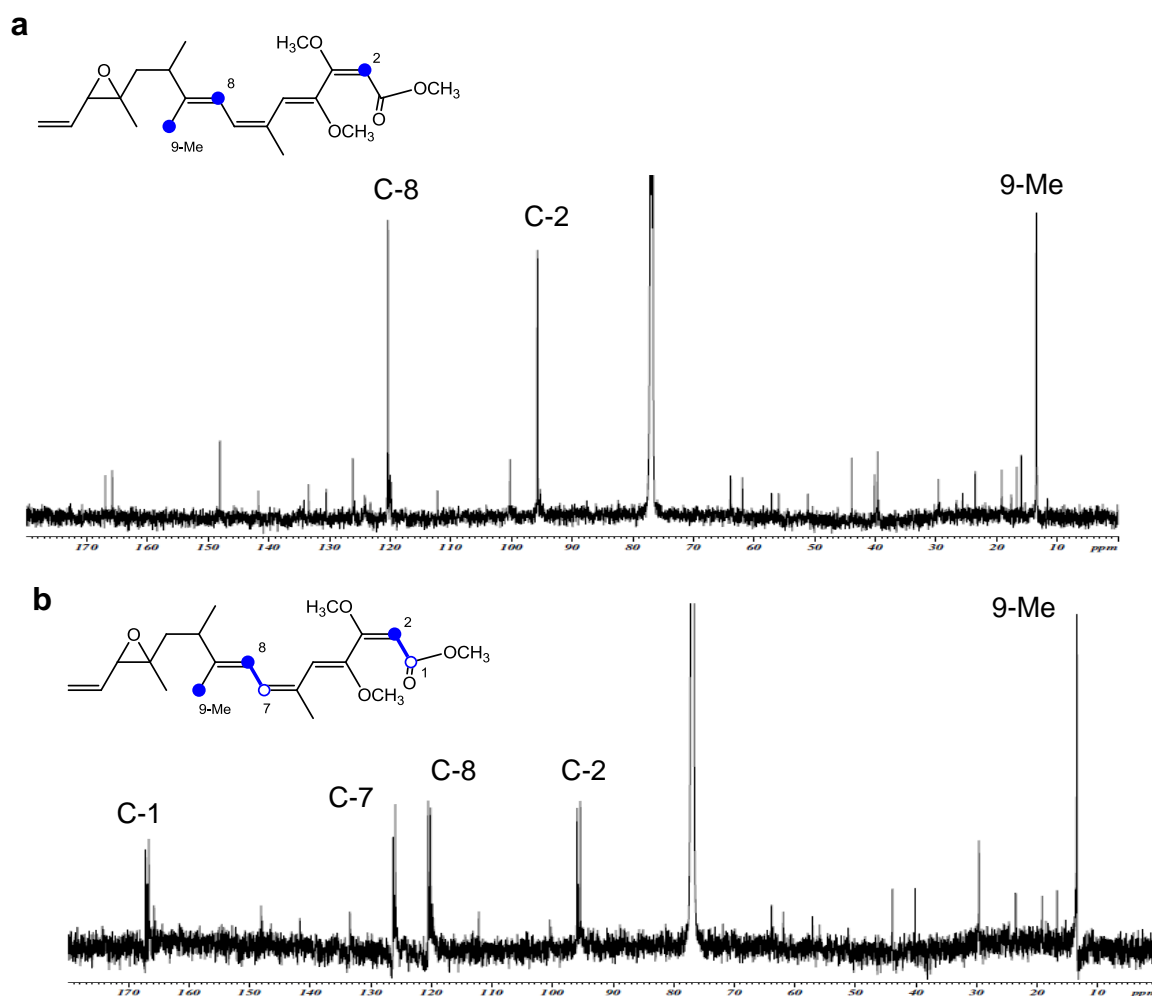

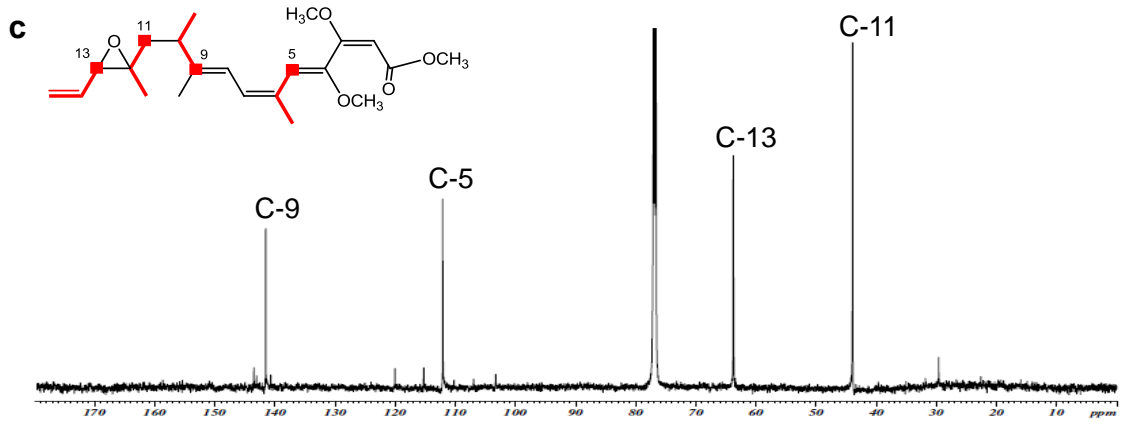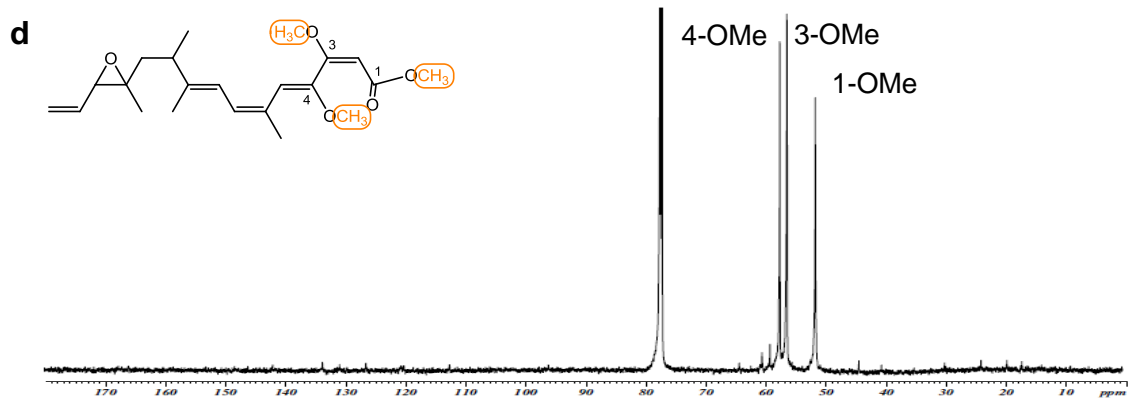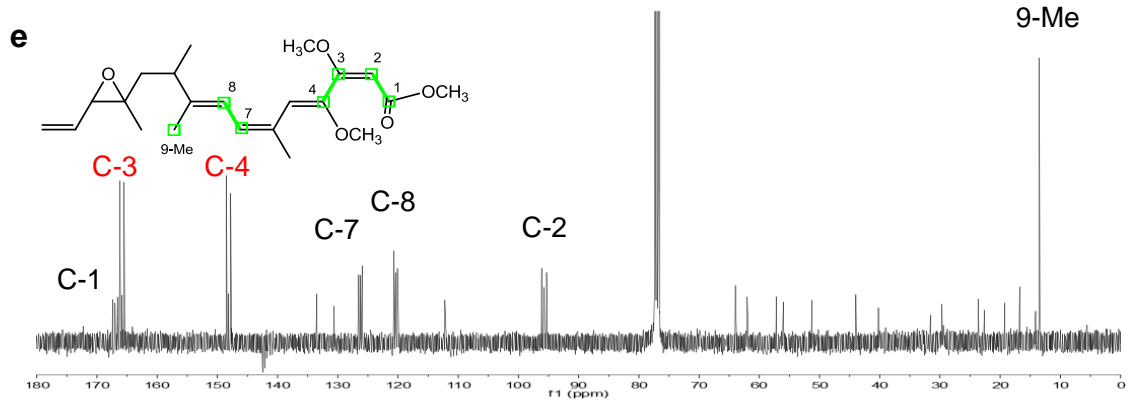

**Figure S10. Phylogenetic analysis of KS domains in *hli* genes**

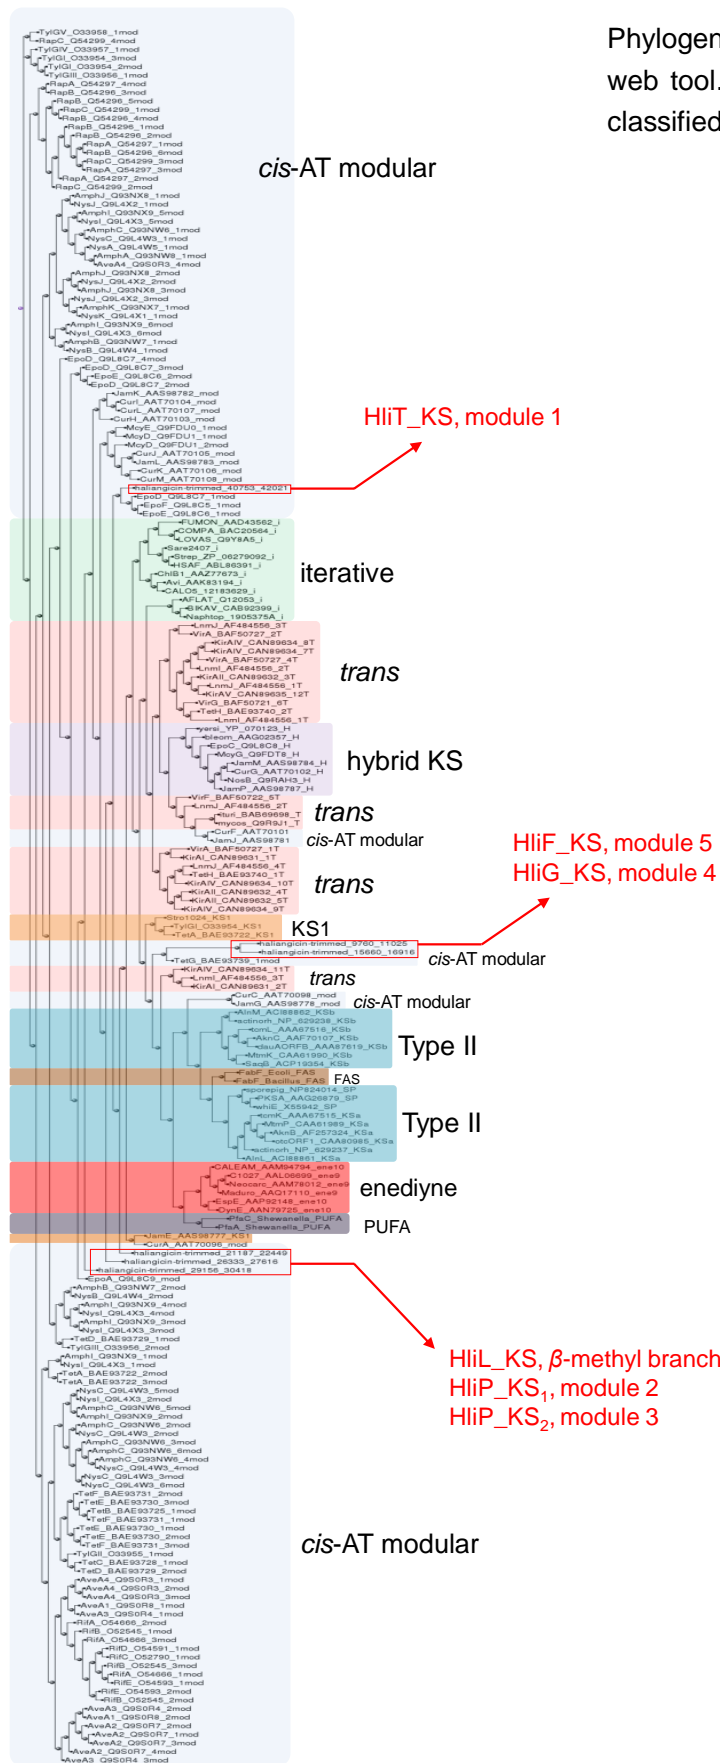

Phylogenetic tree generated by NaPDoS web tool. All the KS domains in *hli* are classified into the modular type.

## Figure S11. Proposed starter biosynthesis of haliangicin

**a.** Utilization of propionyl-CoA as starter (hypothesis 1). After starter loading, the haliangicin biosynthesis needs 6 elongation steps by one iterative KS and four typical KSs to generate the heptaketide backbone. However, sequence analysis of KSs indicated no iterative KS in the *hli* gene cluster (Supplementary Fig. S10). Functional characterization of HliR also does not support hypothesis 1 because propionyl-SNAC is not accepted by HliR (Supplementary Fig. S20b).

**b.** Utilization of dipropionyl-CoA as starter (hypothesis 2). After starter loading, the haliangicin biosynthesis needs 5 elongation steps by five typical KSs to generate the heptaketide backbone. Functional characterization of HliR supports hypothesis 2 because HliR specifically catalyzes the dehydrogenation of the dipropionyl-SNAC (2-methylpent-2-enoyl SNAC) in *in vitro* enzymatic reaction (Fig. 7b).

### a hypothesis 1 (monopropionate as starter)

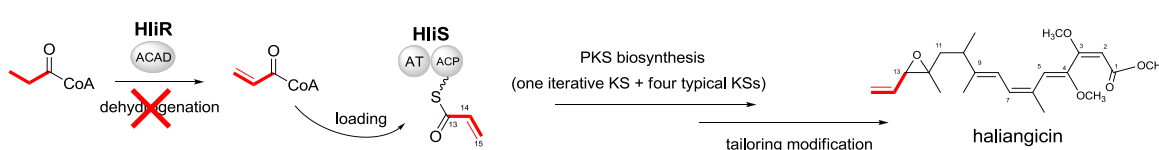

### b hypothesis 2 (dipropionate as starter)

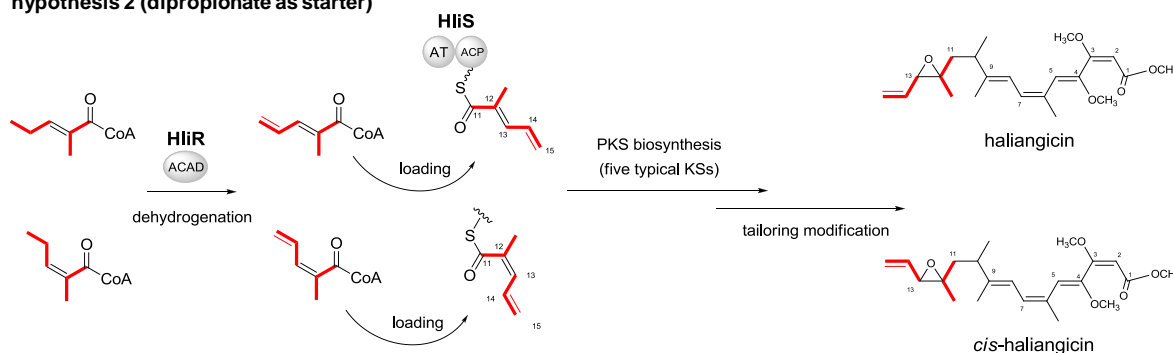



**Figure S12. The putative diketide synthases for the biosynthetic formation of the starters.**

**a.** The putative diketide synthase harboring in the genome of *H.ochraceum*. Hoch\_0693 (1984 amino acids) encodes four domains: KS(11-466), AT (628-863), KR (1235-1413) and DH (1489-1635), which are just fit for one round of elongation reaction to generate an  $\alpha,\beta$ -unsaturated diketide. The successive Hoch\_0692 encodes an acyl-CoA thioesterase which might be involved in the formation of CoA ester of the diketide.

**b.** The putative diketide synthase harboring in the genome of *M.xanthus*. MXAN\_3462 (2216 amino acids) highly resembles Hoch\_0693 and consists of five domains: acyl-CoA thioesterase (4-116), AT (213-509), KS (729-985), KR (1640-1868) and DH (1945-2070). The roles of its accompanying enzymes, including MXAN\_3456 (radical SAM domain-containing protein), MXAN\_3460 (oxidoreductase), MXAN\_3461 (short chain dehydrogenase/reductase oxidoreductase), MXAN\_3461 (fatty acid desaturase), MXAN\_3465 (histidine ammonia-lyase) and MXAN\_3466 (aspartate kinase) remain unclear.

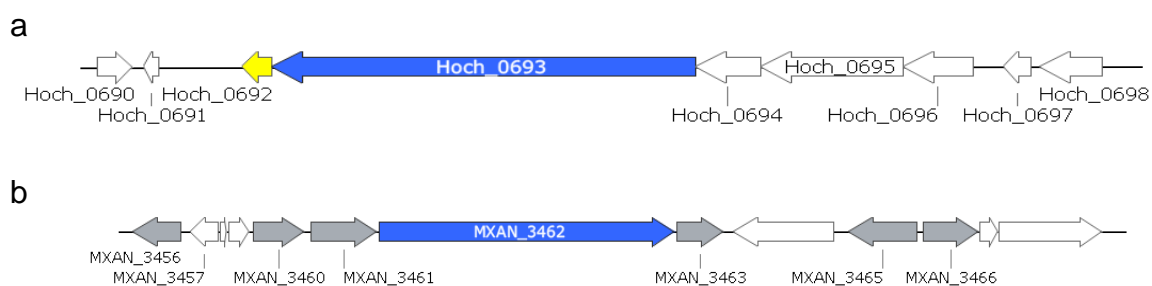

### Figure S13. Proposed $\beta$ -methyl branching biochemistry in haliangicin biosynthesis.

Module 2 generates a  $\beta$ -ketoacyl intermediate just fit for one round of  $\beta$ -methyl installation biochemistry to install 9-Me at C9. The core biosynthetic machinery for  $\beta$ -methyl branching requires at least one HMG-CoA synthase (HCS), one  $\beta$ -keto synthase with a Cys-to-Ser mutation ( $KS^S$ ), one free-standing ACP and two enoyl-CoA hydratases (ECH).<sup>8</sup> *Hlii* lacks a  $\beta$ -keto synthase ( $KS^S$ ), which is critical for decarboxylation, leading to a hypothesis that the KS domain in HliL complements this  $KS^S$ , although it appears to be a typical KS that retains the conserved triad active residues (CHH). Mueller, *et al.* recently reported a similar bifunctional protein CroD in *Chondromyces crocatus*, in which the KS domain also does not feature the Cys-to-Ser mutation.<sup>9</sup>

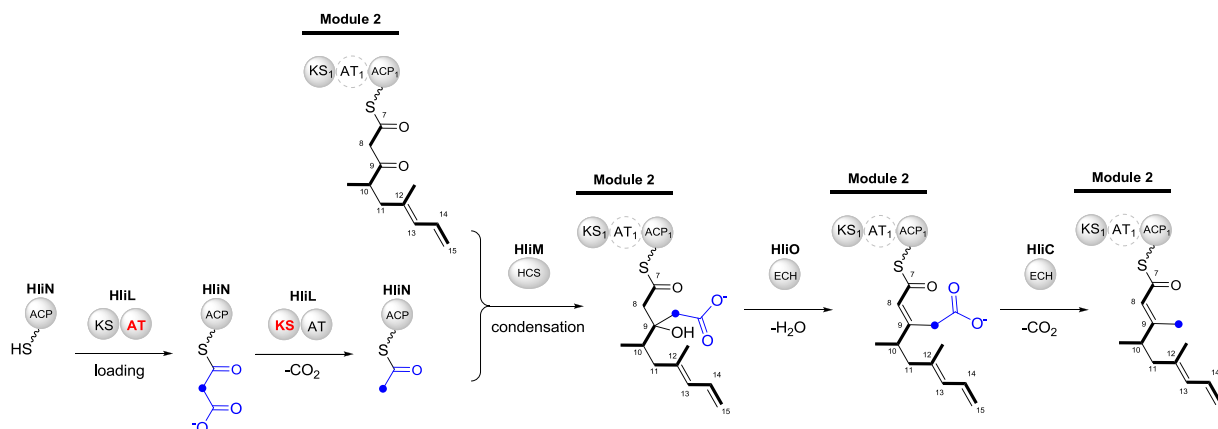

### Figure S14. Proposed biosynthetic pathway of methoxymalony-ACP in haliangicin biosynthesis.

The biosynthetic genes responsible for the methoxymalonyl-ACP formation in haliangicin biosynthesis consist of *hli Q*, *H ~ K*, which showed a high similarity to *pelG*, *H ~ K* in the pellasoren biosynthetic gene cluster.<sup>10</sup> Similar to pellasoren, the presence of a multifunctional protein HliQ (AT-ACP-O-MT) leads to several functionally redundant proteins. The AT domain of HliQ and HliH are both supposed to recognize 1,3-biphosphoglycerate and load it to an ACP (the ACP of HliQ or the freestanding HliI, which is also presenting in duplicate).

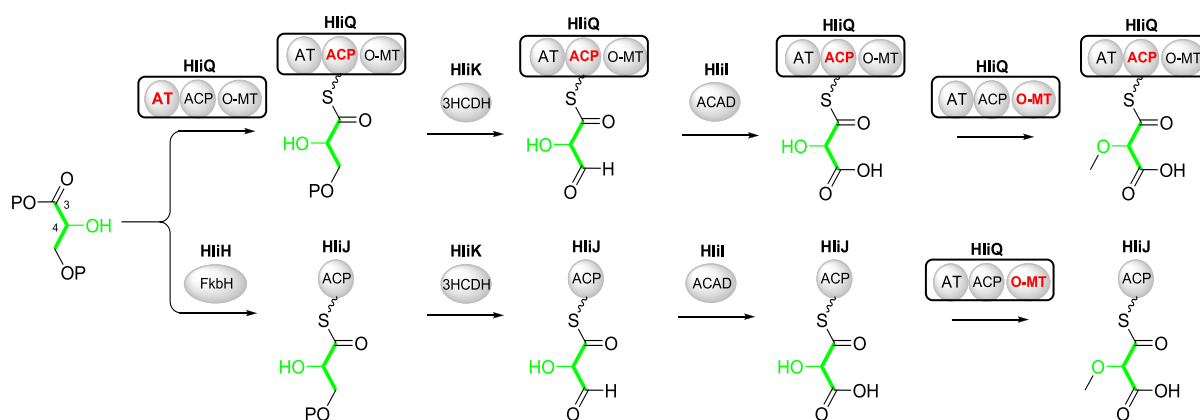

## Figure S15. Inactivation of HliR (acyl-CoA dehydrogenase).

- Disruption of *hliR* via single crossover homologous recombination.
- Verification of  $\Delta hliR$  mutant by PCR (Pair A: M13f(-47)/ORF18ACAD-Out f; Pair B: M13r(-48)/ORF18ACAD-Out r; Pair C: ORF18ACAD-Out f/ ORF18ACAD-Out r).
- Production profile of *M. xanthus*  $\Delta hliR$ . Production of 14,15-dihydrohaliangicin (**4**,  $t_R = 24.8$  min) was observed in HPLC analysis [Develosil ODS-UG-5 ( $\Phi$  4.6 x 250 mm), 75% MeOH, 1.0 mL/min, detected at 290 nm].

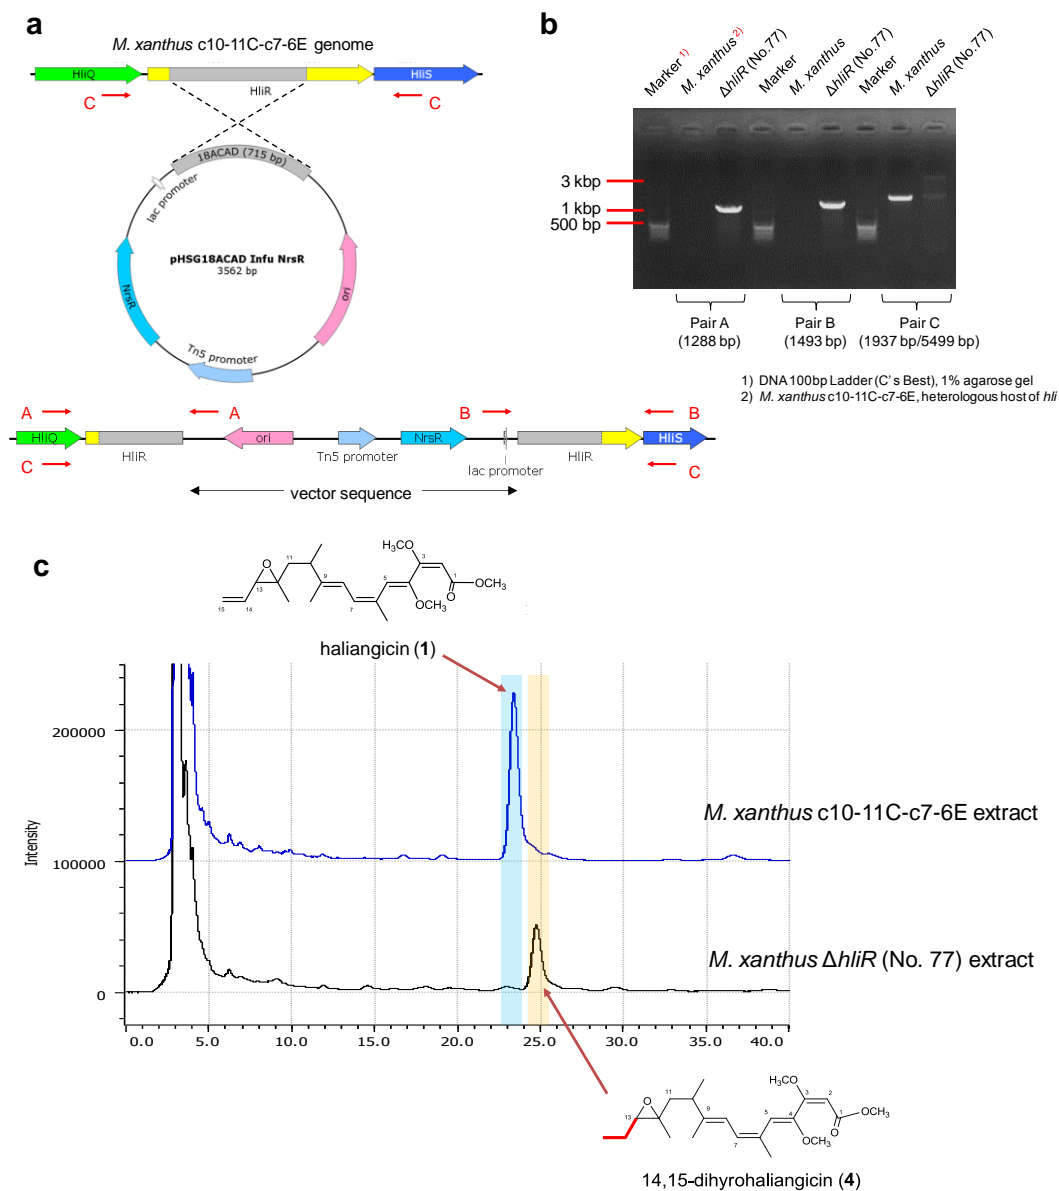

## Figure S16. Inactivation of HliD (O-methyltransferase).

- a.** Disruption of *hliD* via single crossover homologous recombination.
- b.** Verification of  $\Delta hliD$  mutant by PCR. (Pair A: M13r(-48)/ ORF4-MT-Ex-f1; Pair B: M13f(-47)/ ORF4-MT-Ex-r1; Pair C: ORF4-MT-Ex-f1/ ORF4-MT-Ex-r1).
- c.** Production profile of *M. xanthus*  $\Delta hliD$ . Production of 1-O-demethylhaliangicin (**6**,  $R_t = 36.5$  min) and 1-O-demethyl-12,13-deoxyhaliangicin (**5**,  $R_t = 41$  min) were observed in HPLC analysis [Develosil ODS-UG-5 ( $\Phi$  4.6 x 250 mm), linear gradient elution of 20% to 100% (40 min) methanol in  $H_2O$ , 1.0 mL/min, detected at 290 nm].
- d.** LC-MS analysis of *M. xanthus*  $\Delta hliD$  extract. Conditions: Cadenza CD-C18 (2 x 75 mm), 30 to 100% (35 min) MeOH-0.1% HCOOH, 0.1 mL/min (1/20 split ratio), sample 20  $\mu$ L broth eq.

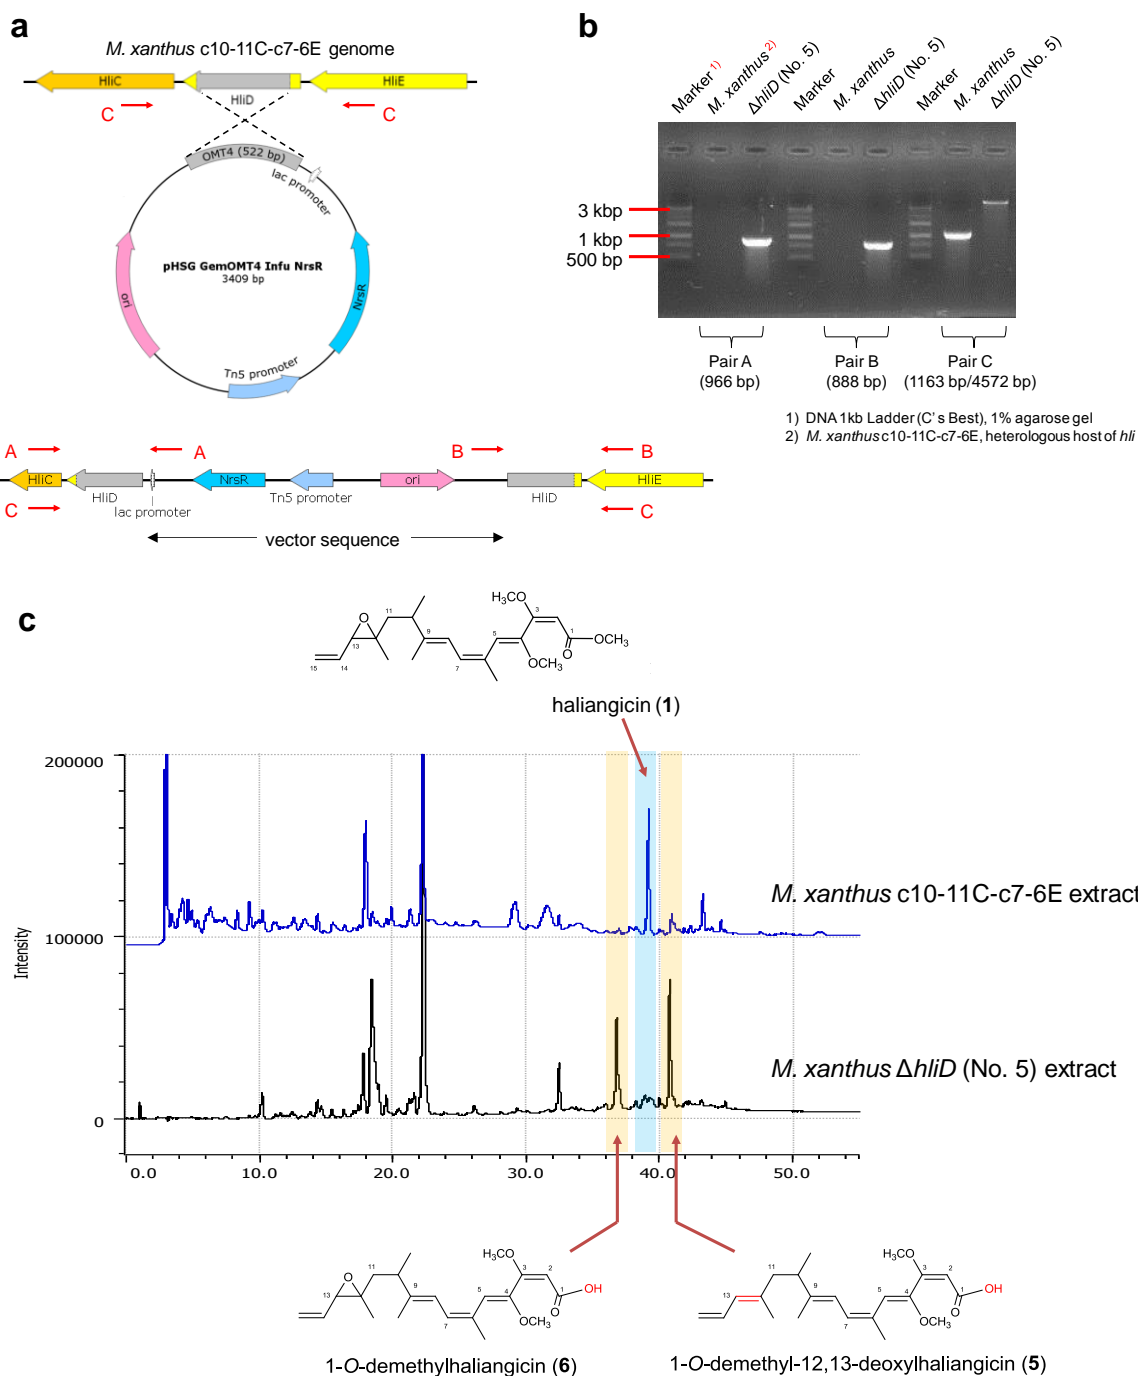



**Figure S17. Methyl esterification of *M. xanthus*  $\Delta hliD$  extracts using TMS diazomethane.**

HPLC analysis of *M. xanthus*  $\Delta hliD$  extracts before (blue) and after (red) methyl esterification by diazomethane, comparing with authentic sample of 12,13-deoxyhaliangicin (**7**, orange) and haliangicin (**1**, green).

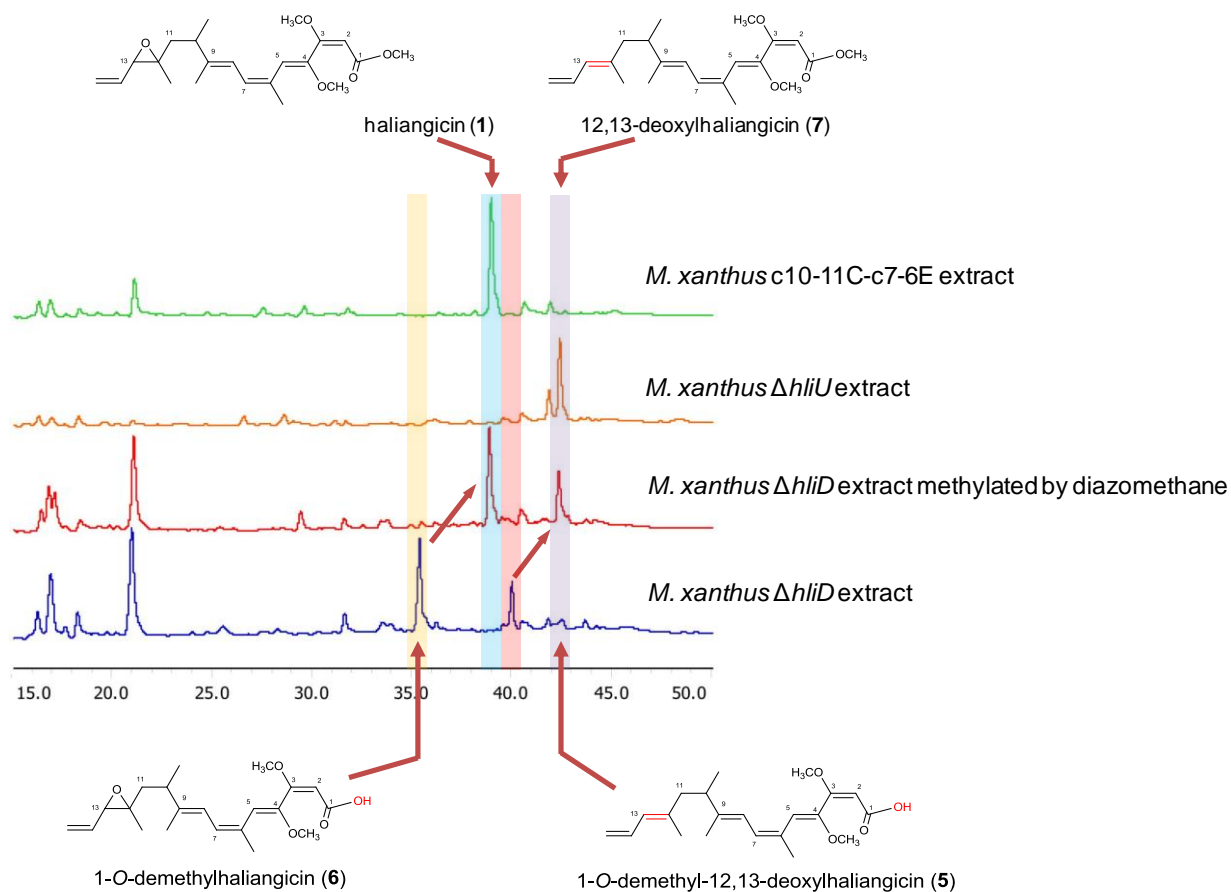

## Figure S18. Inactivation of HliU (epoxidase).

- Disruption of *hliU* via single crossover homologous recombination.
- Verification of  $\Delta hliU$  mutant by PCR. (Pair A: M13f(-47)/ ORF21Ox-Out F2; Pair B: M13r(-48)/ ORF21Ox-Out R; Pair C: ORF21Ox-Out F2/ ORF21Ox-Out R).
- Production profile of *M. xanthus*  $\Delta hliU$ . Production of 12,13-deoxyhaliangicin (**7**,  $t_R = 43$  min) was observed in HPLC analysis [Develosil ODS-UG-5 ( $\Phi$  4.6  $\times$  250 mm), linear gradient elution of 20% to 100% (40 min) methanol in H<sub>2</sub>O, 1.0 mL/min, detected at 290 nm]

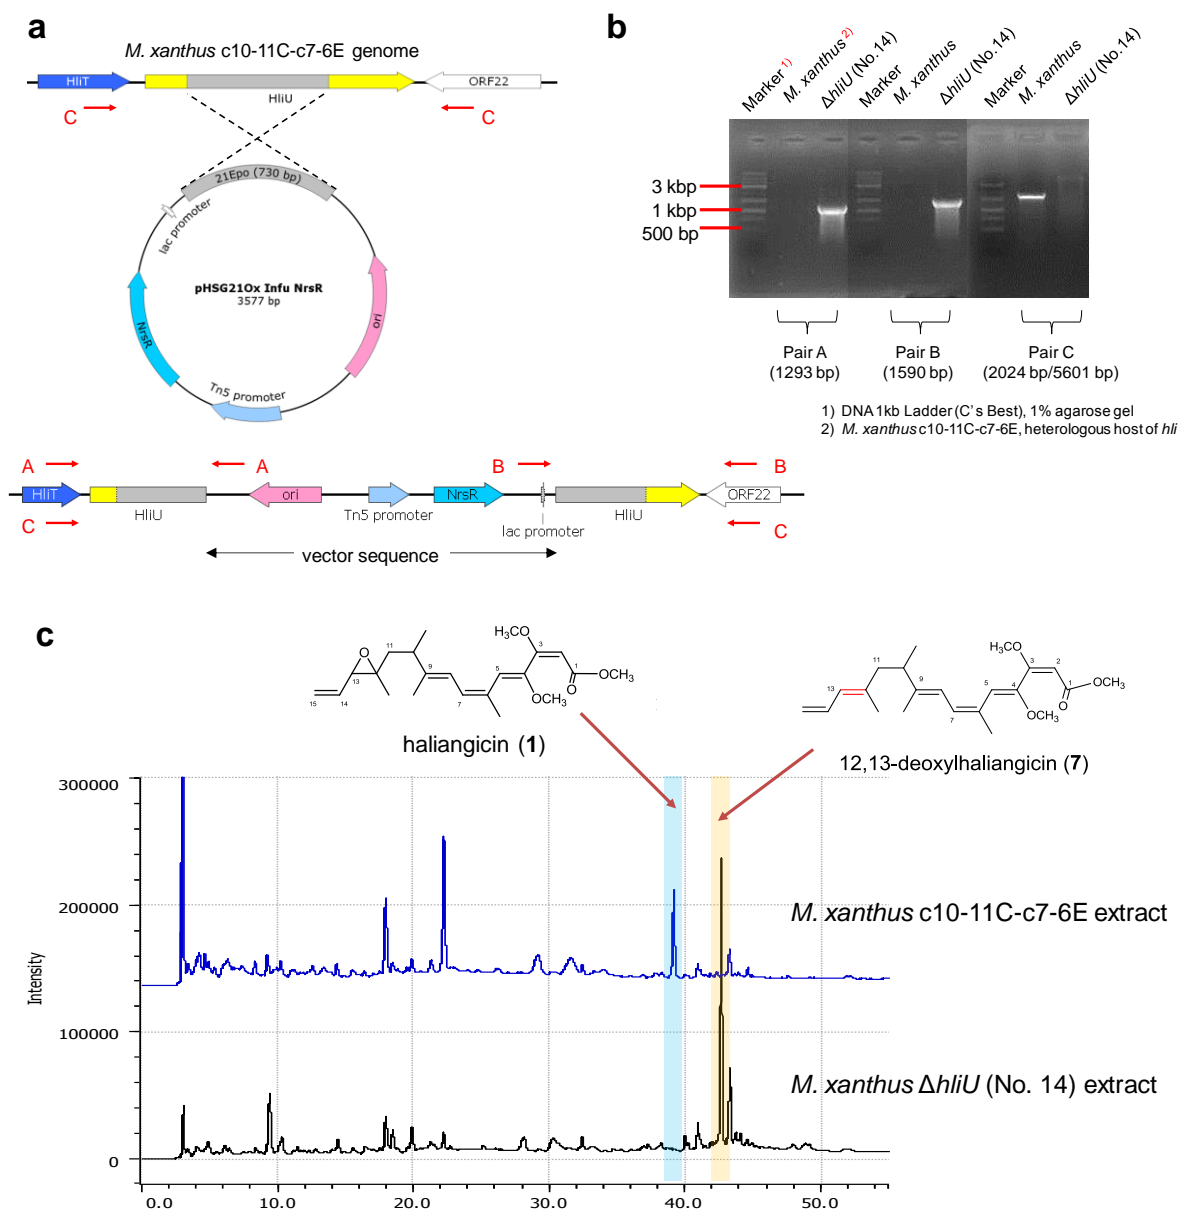

### Figure S19. Expression and purification of recombinant HliR.

SDS-PAGE (10% Tris-HCl gel) of recombinant HliR. Marker: Precision Plus Protein™ Dual Color Standards (BioRad)

a. Soluble protein extracted from *E. coli* KRX pET32a HliR with/without induction of 0.1% rhamnose and 0.4 mM IPTG

b. Purified N-His<sub>6</sub>-HliR

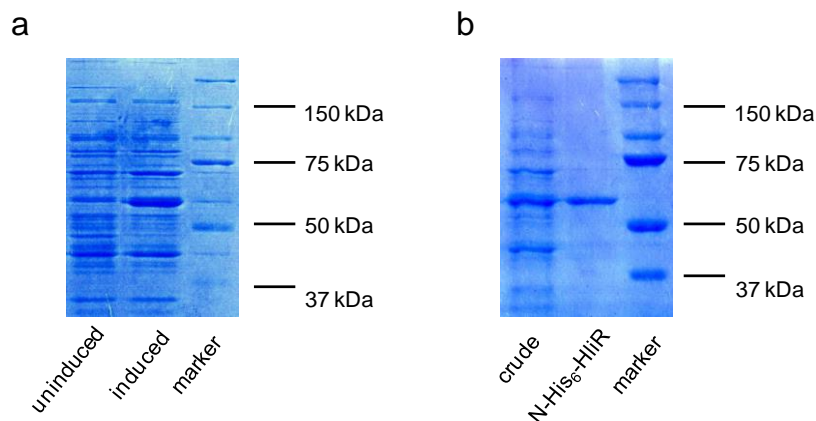

### Figure S20. *In vitro* enzymatic reaction of recombinant HliR.

HPLC analyses of the HliR enzymatic reactions using 14,15-dihydrohaliangicin (**4**) (a), propionyl SNAC (**b**), butyryl SNAC (**c**), valeryl SNAC (**d**), hexanoyl SNAC (**e**) heptanoyl SNAC (**f**), 2-methylvaleryl SNAC (**g**), 4-methylvaleryl SNAC (**h**), 4-pentenoyl SNAC (**i**), 2-methyl-4-pentenoyl SNAC (**j**), cyclo-1-pentenoyl SNAC (**k**), cyclo-1-hexenoyl SNAC (**l**)

HPLC condition: Develosil ODS-UG-5 ( $\phi$  4.6 × 250 mm); 75% methanol, flow rate 1.0 mL/min, and UV detection at 290 nm for **a**; 50% methanol, flow rate 0.6 mL/min, and UV detection at 239 nm for **b**; 60% methanol, flow rate 0.6 mL/min, and UV detection at 254 nm for **c-e**, **g-l**; 75% methanol, flow rate 0.6 mL/min, and UV detection at 254 nm for **f**;

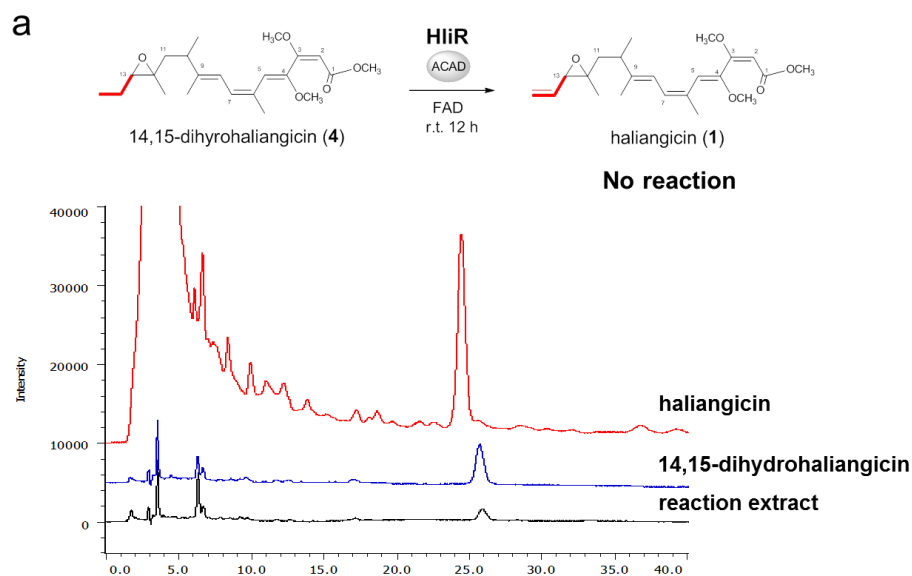



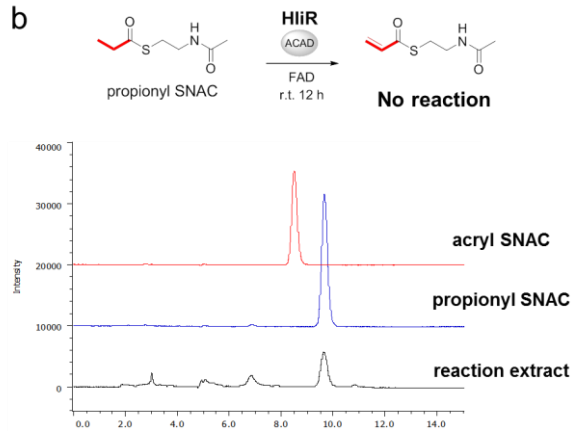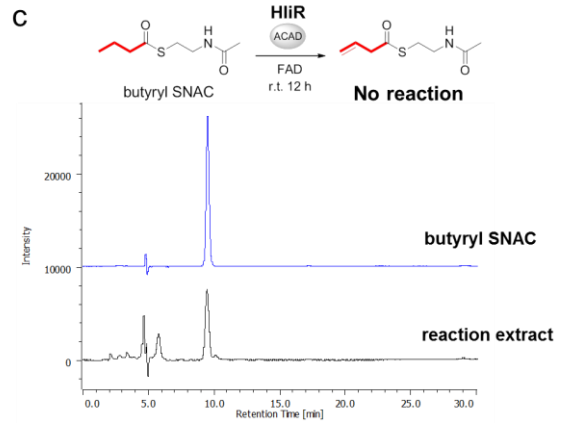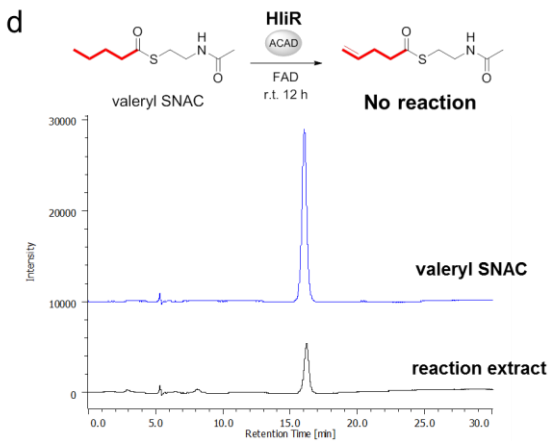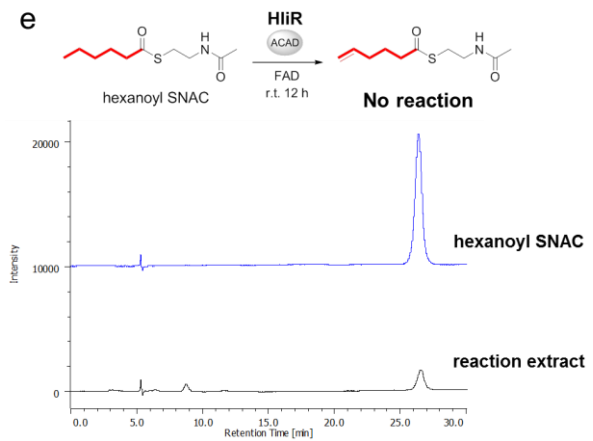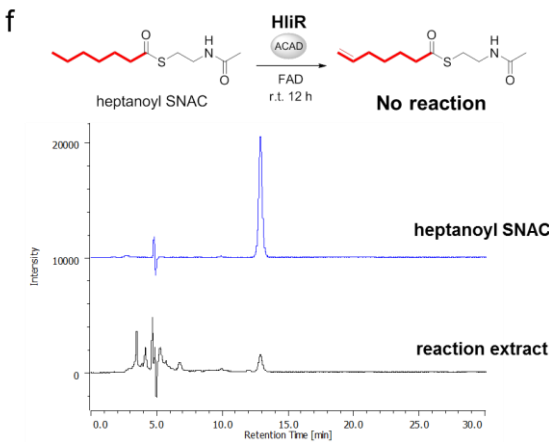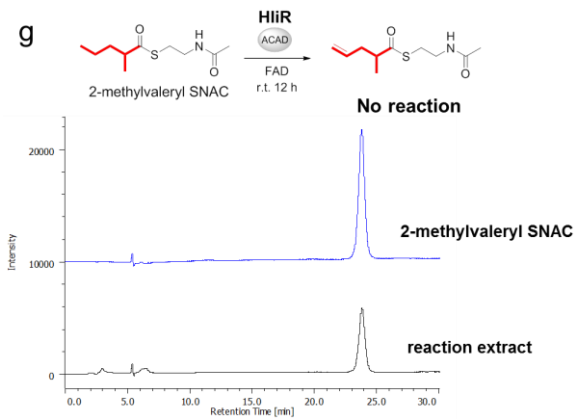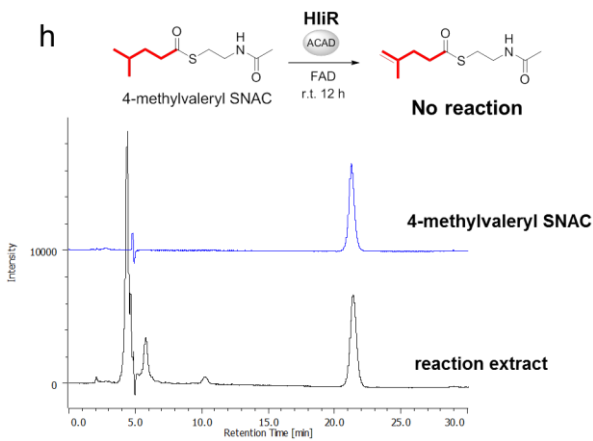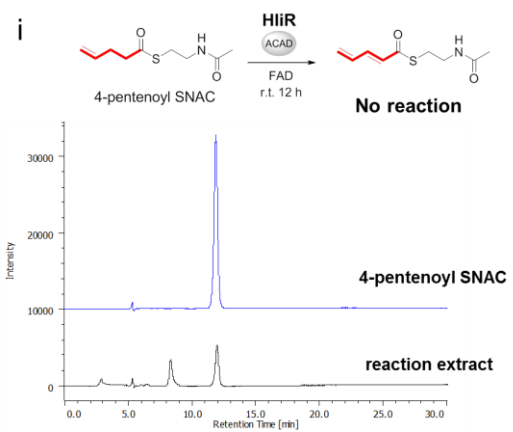

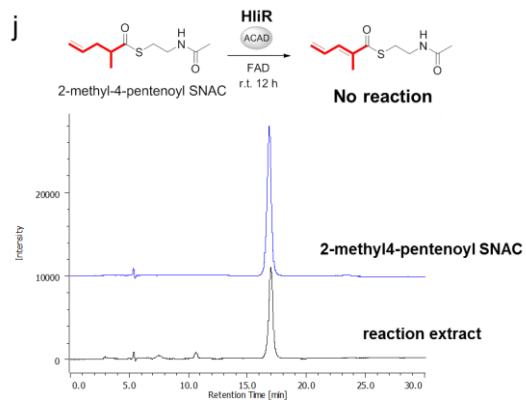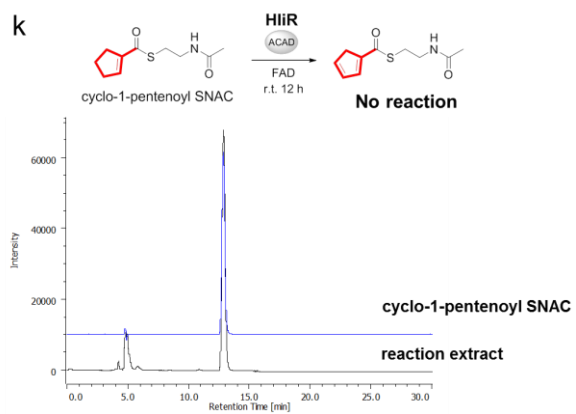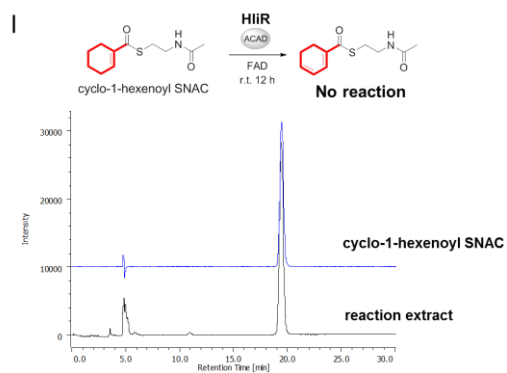

### Figure S21. Spectra of 14,15-dihydrohaliangicin (4).

a. <sup>1</sup>H NMR (400 MHz, CDCl<sub>3</sub>); b. <sup>13</sup>C NMR (100 MHz, CDCl<sub>3</sub>); c. HMQC; d. NOESY; e. UV; f. IR; g. ESI-MS

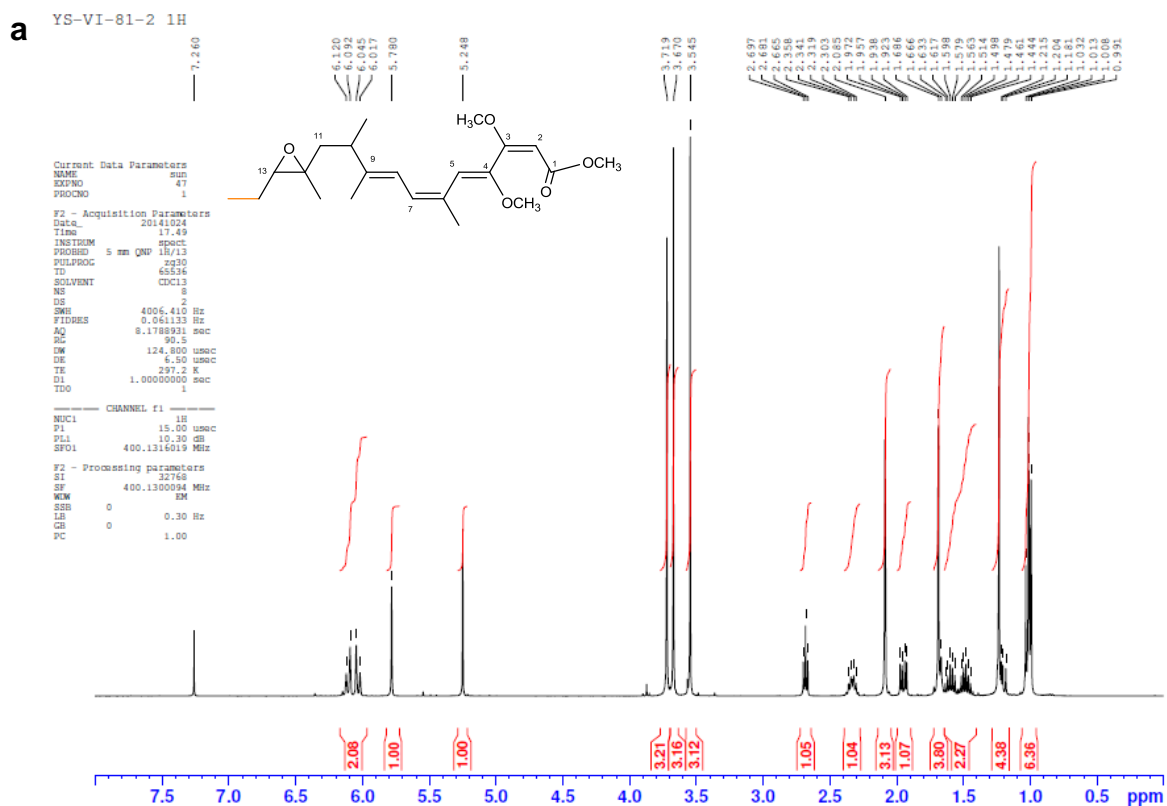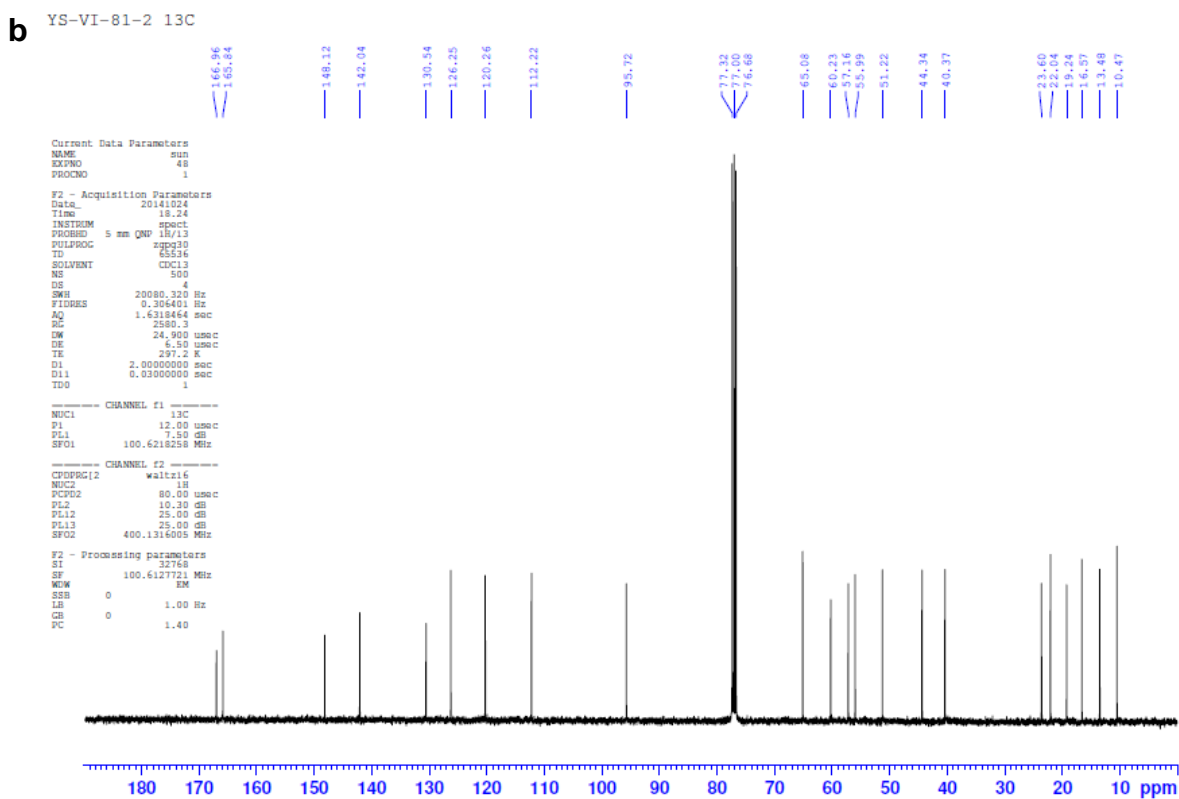

c

HMQC

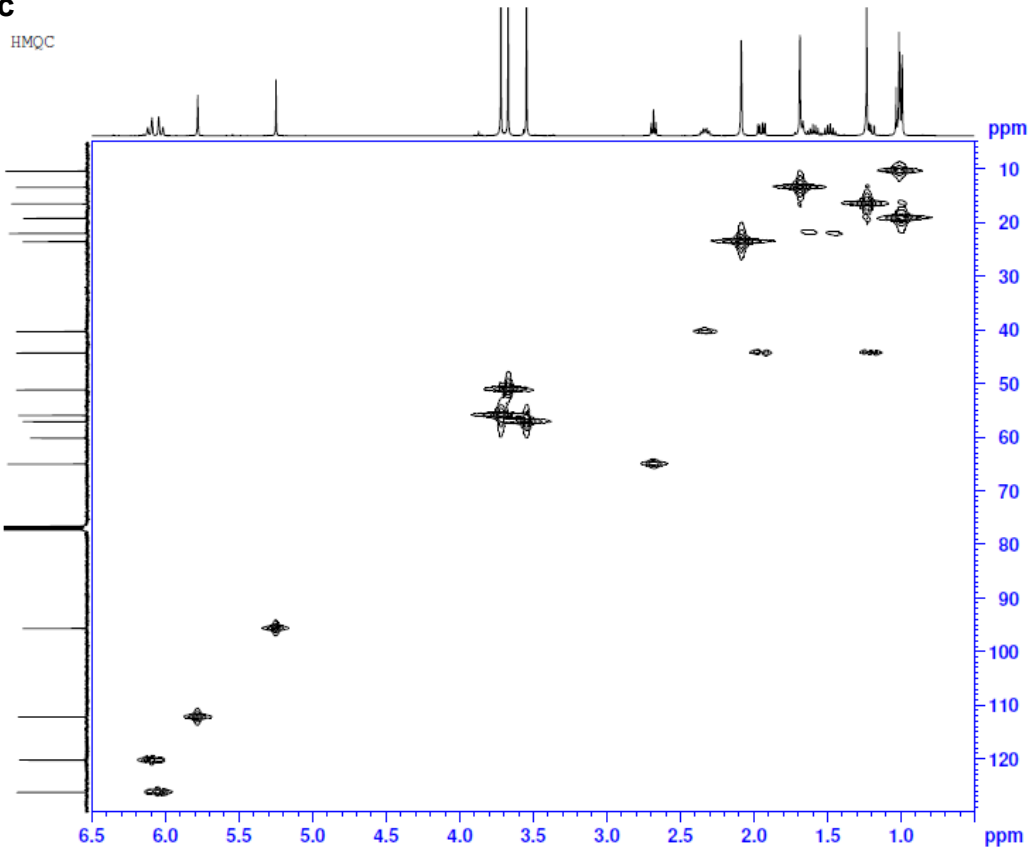

d

YS-VI-81-2 NOESY

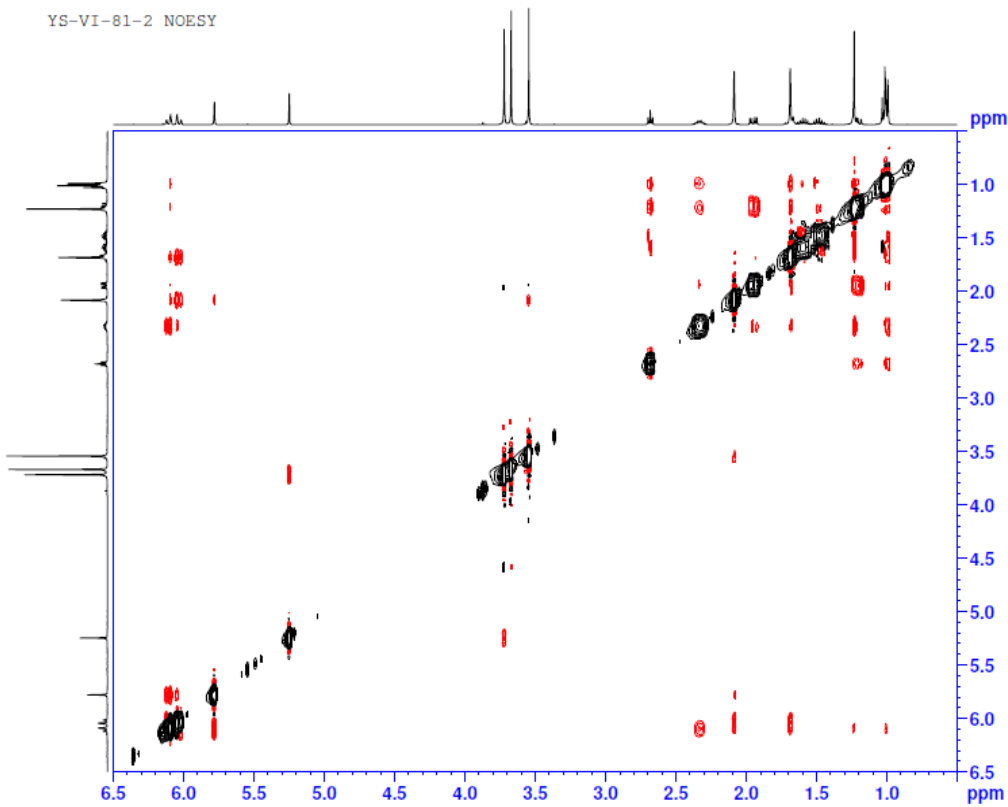

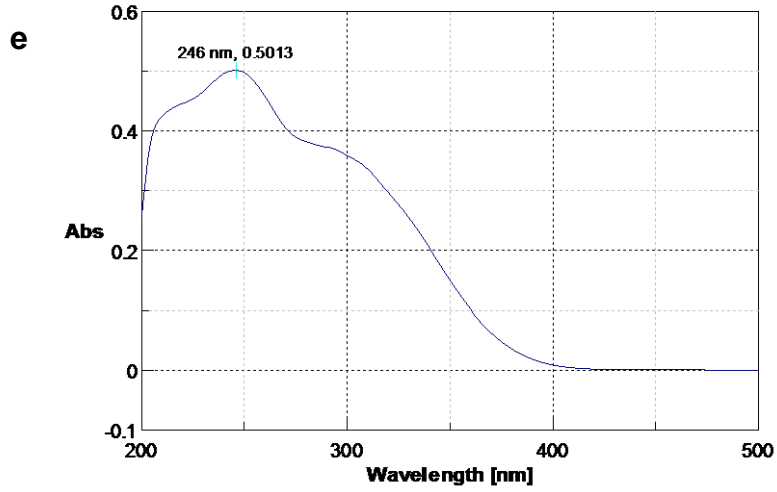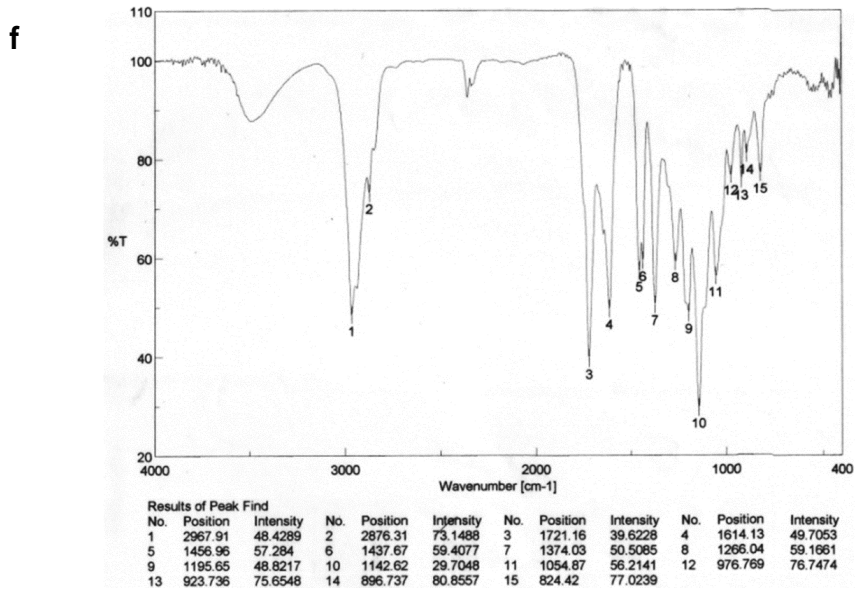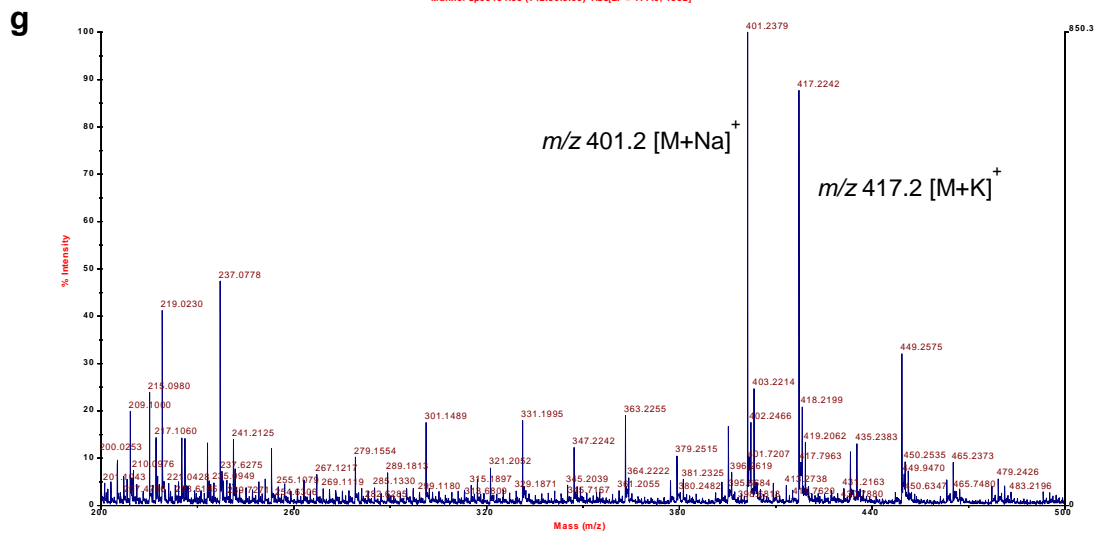

**Figure S22. Spectra of 12,13-deoxyhaliangicin (7).**

**a.**  $^1\text{H}$  NMR (400 MHz,  $\text{CDCl}_3$ ); **b.**  $^{13}\text{C}$  NMR (100 MHz,  $\text{CDCl}_3$ ); **c.** HMQC; **d.** NOESY; **e.** UV; **f.** IR; **g.** ESI-MS.

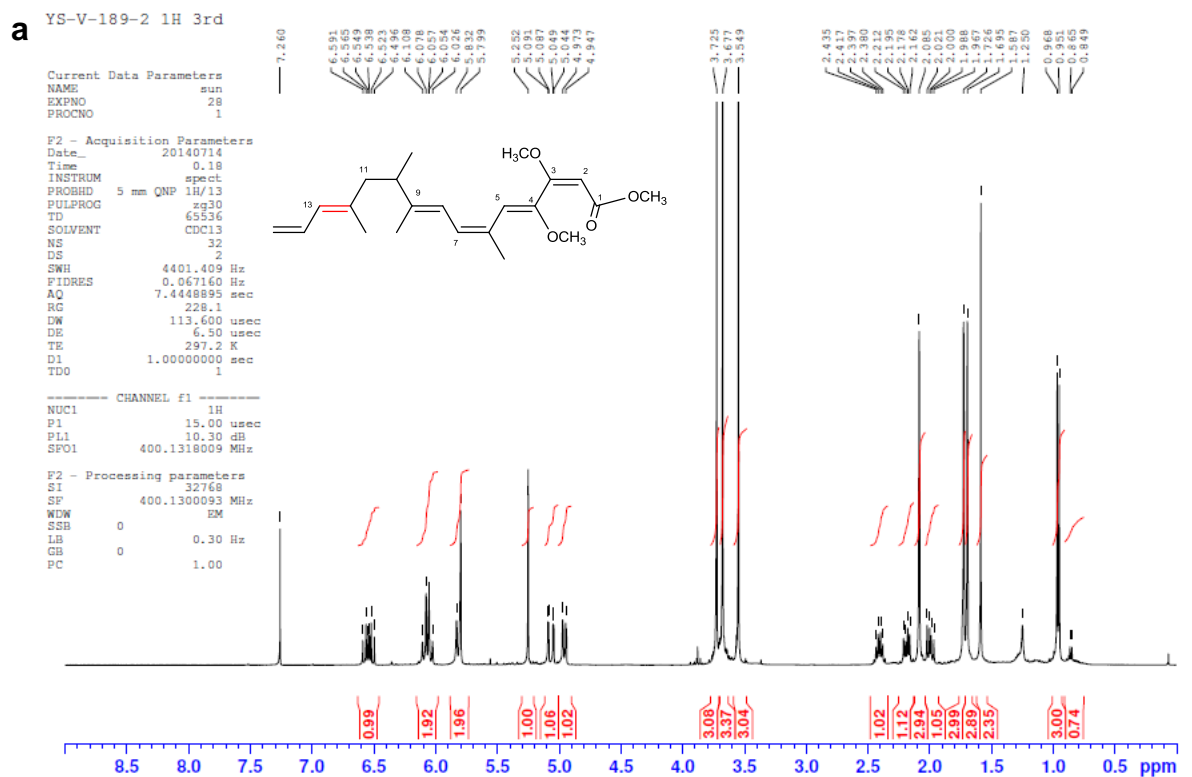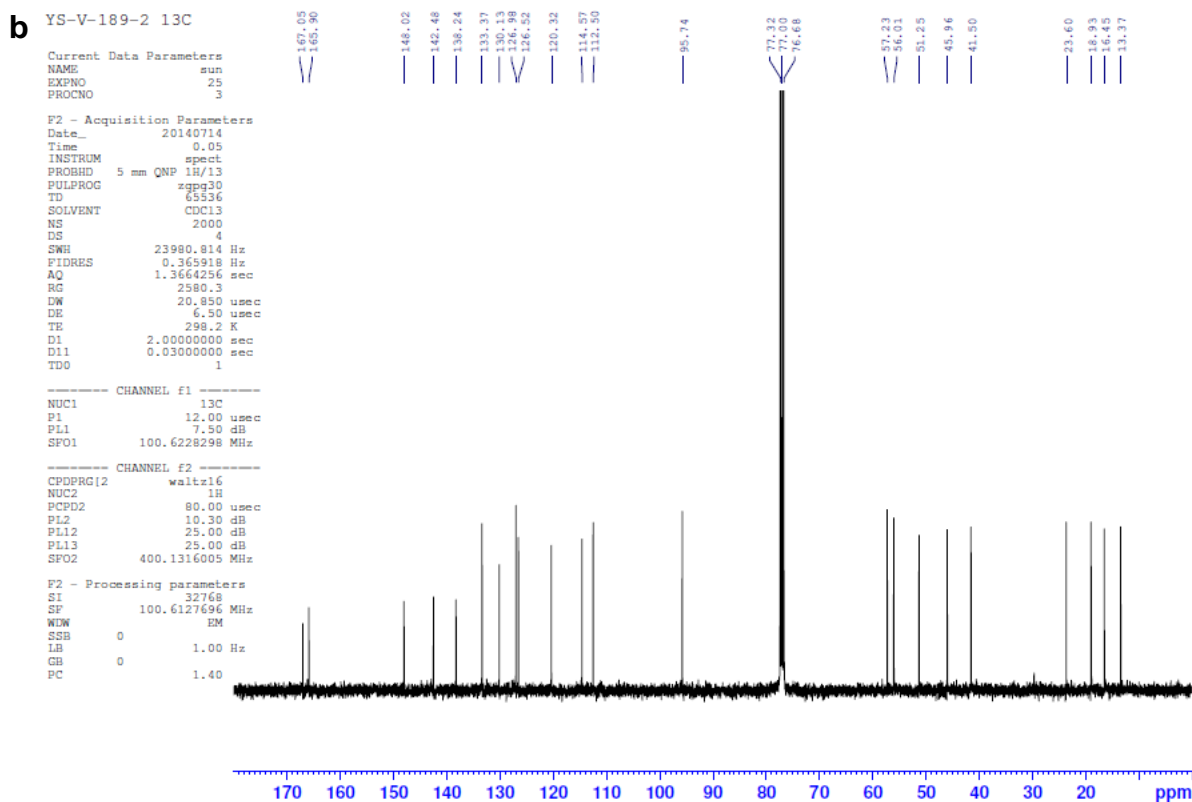

**c** YS-V-189-2 HMQC

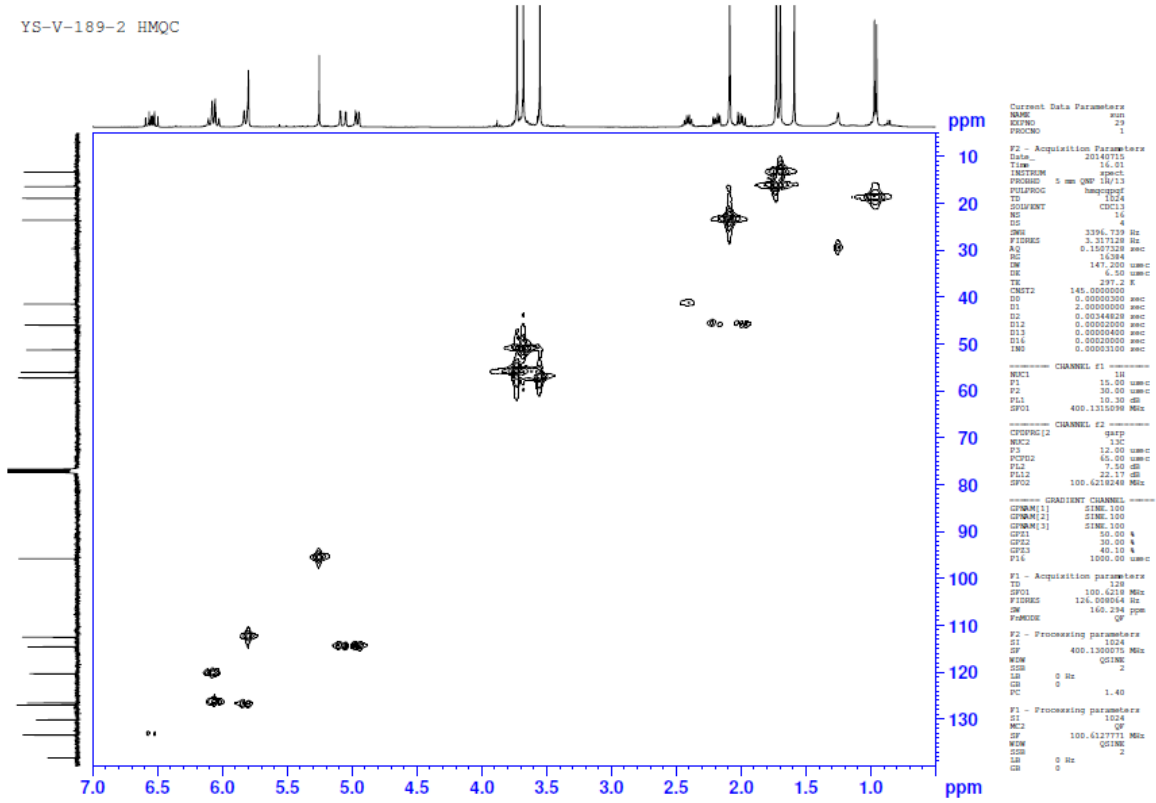

**d** YS-V-189-2 NOESY

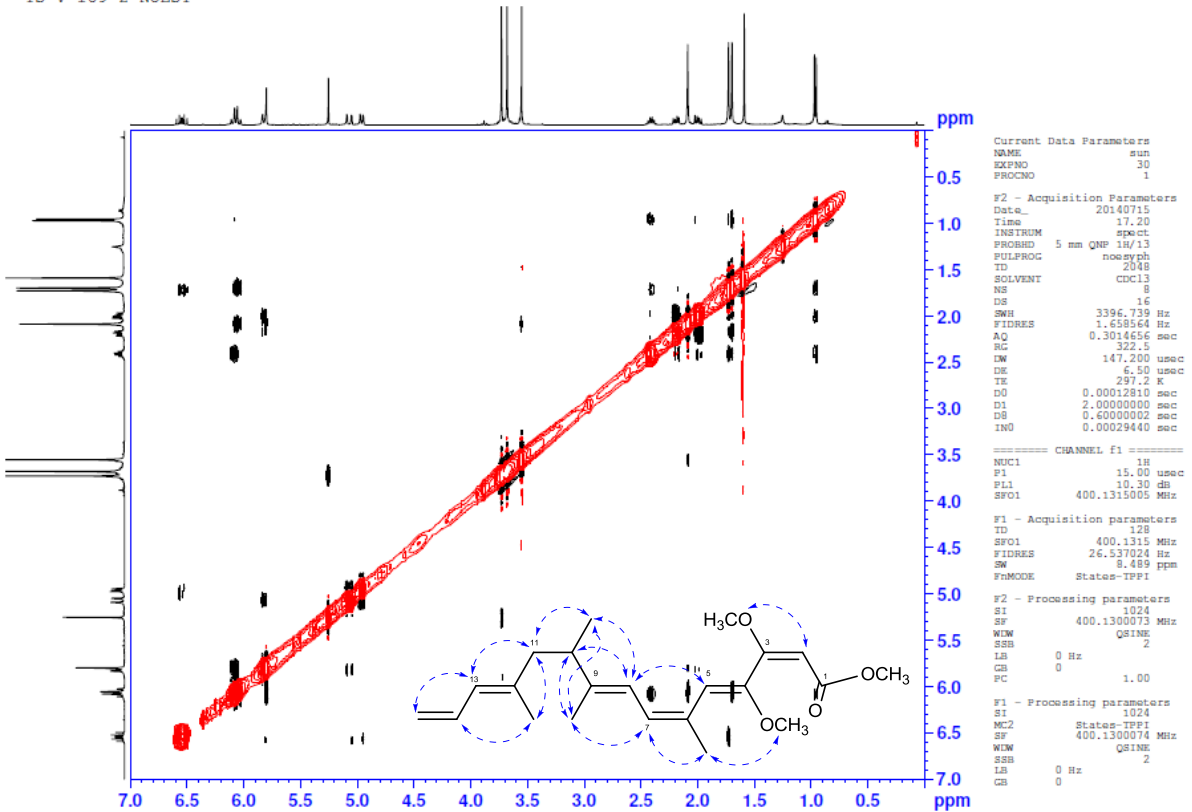

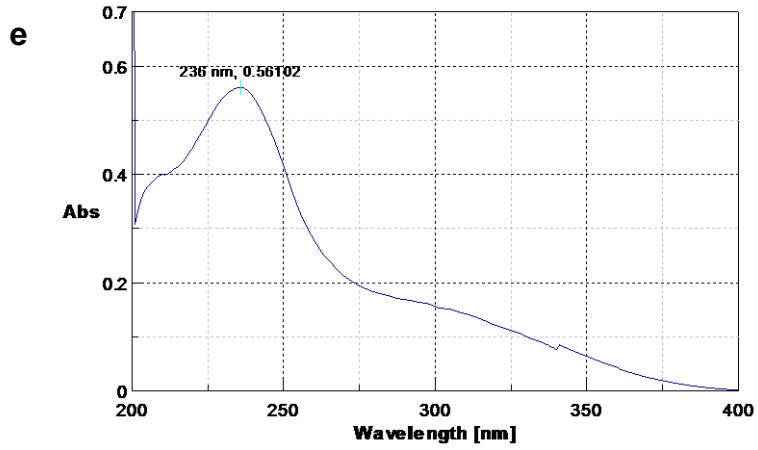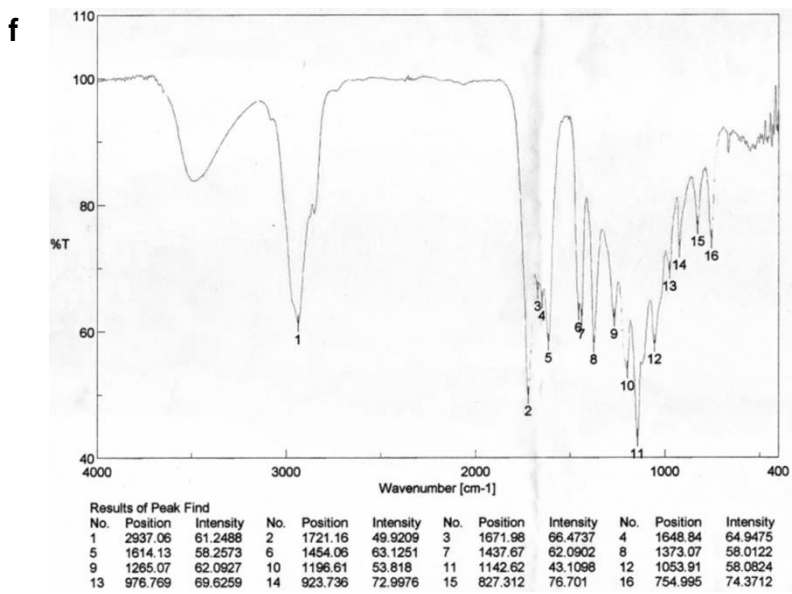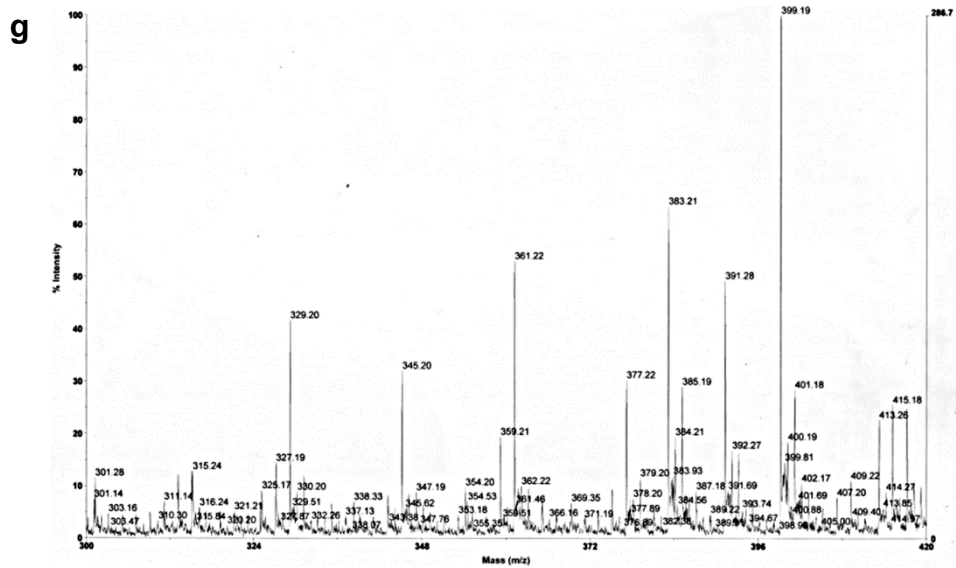



**Figure S23. NMR spectra of haliangicin (1).**

**a.**  $^1\text{H}$  NMR (400 MHz,  $\text{CDCl}_3$ ); **b.**  $^{13}\text{C}$  NMR (100 MHz,  $\text{CDCl}_3$ ).

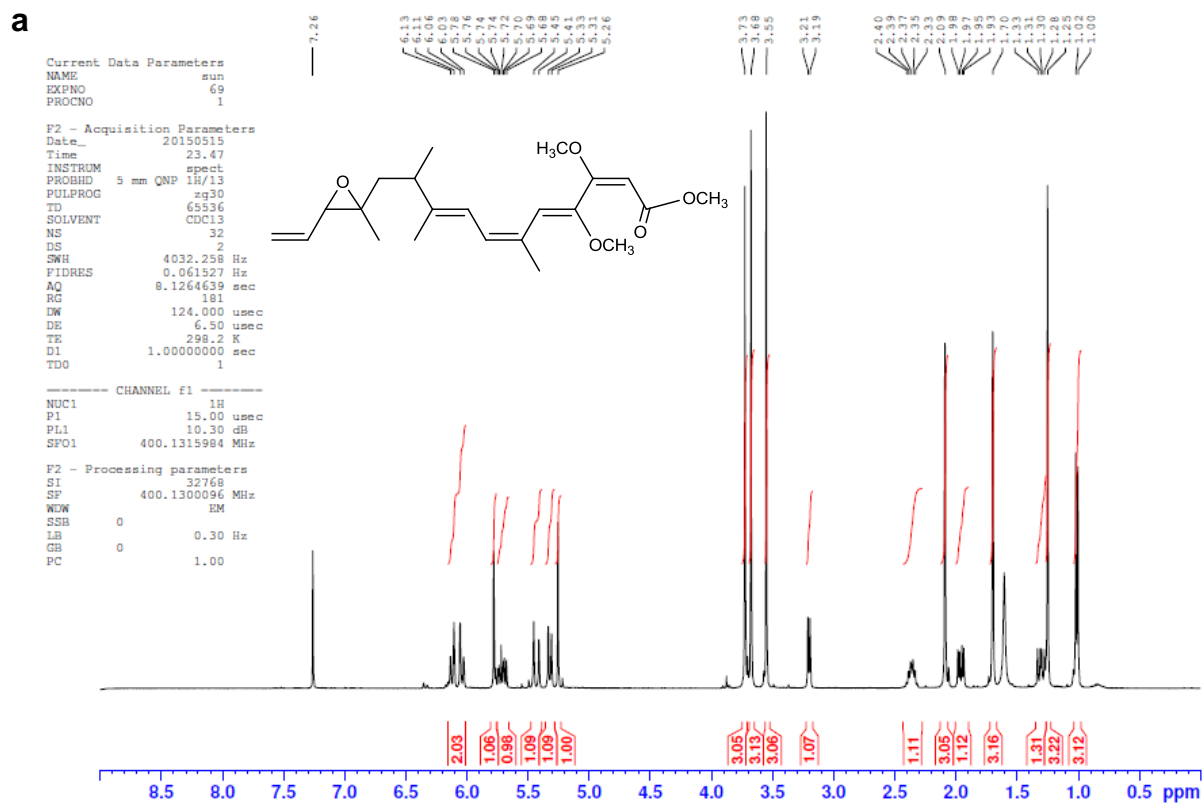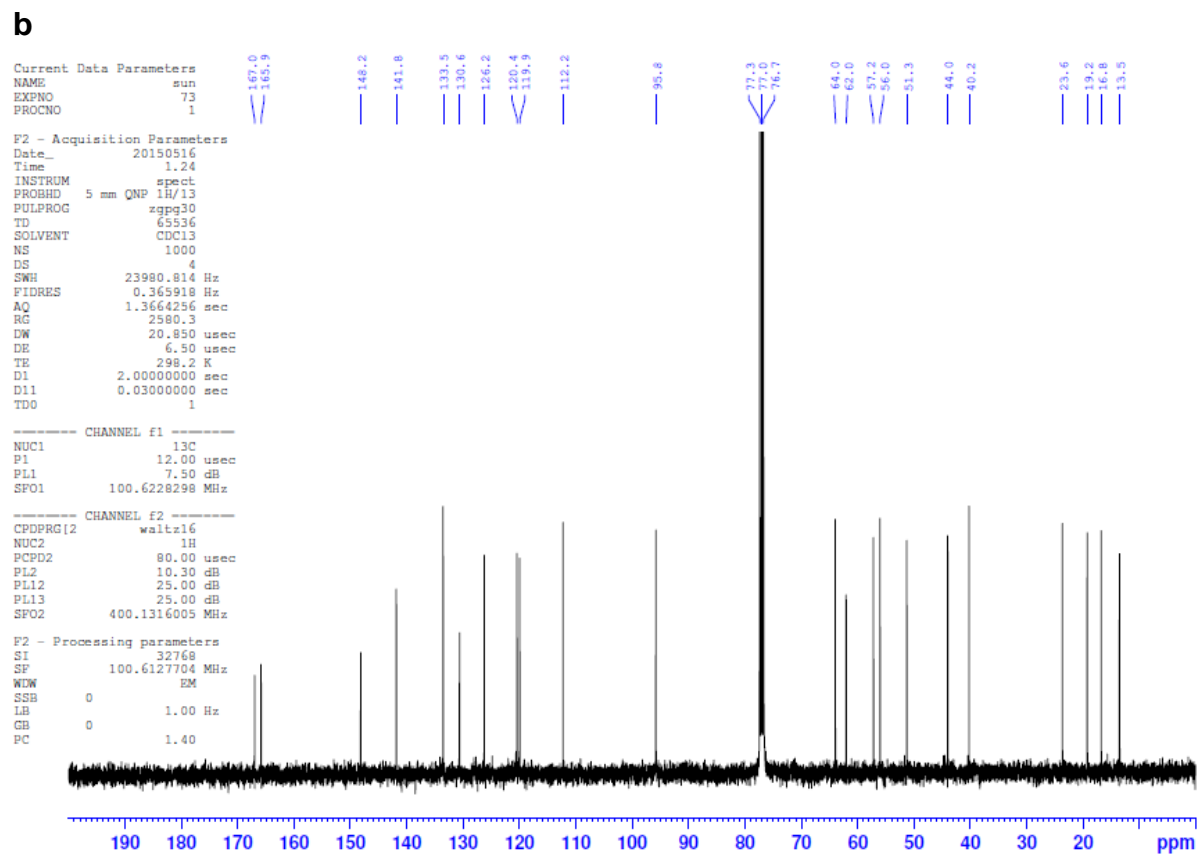

**Figure S24. NMR spectra of 2-methylpent-2,4-dienoyl SNAC (3a).**

**a.**  $^1\text{H}$  NMR (400 MHz,  $\text{CDCl}_3$ ); **b.**  $^{13}\text{C}$  NMR (100 MHz,  $\text{CDCl}_3$ ).

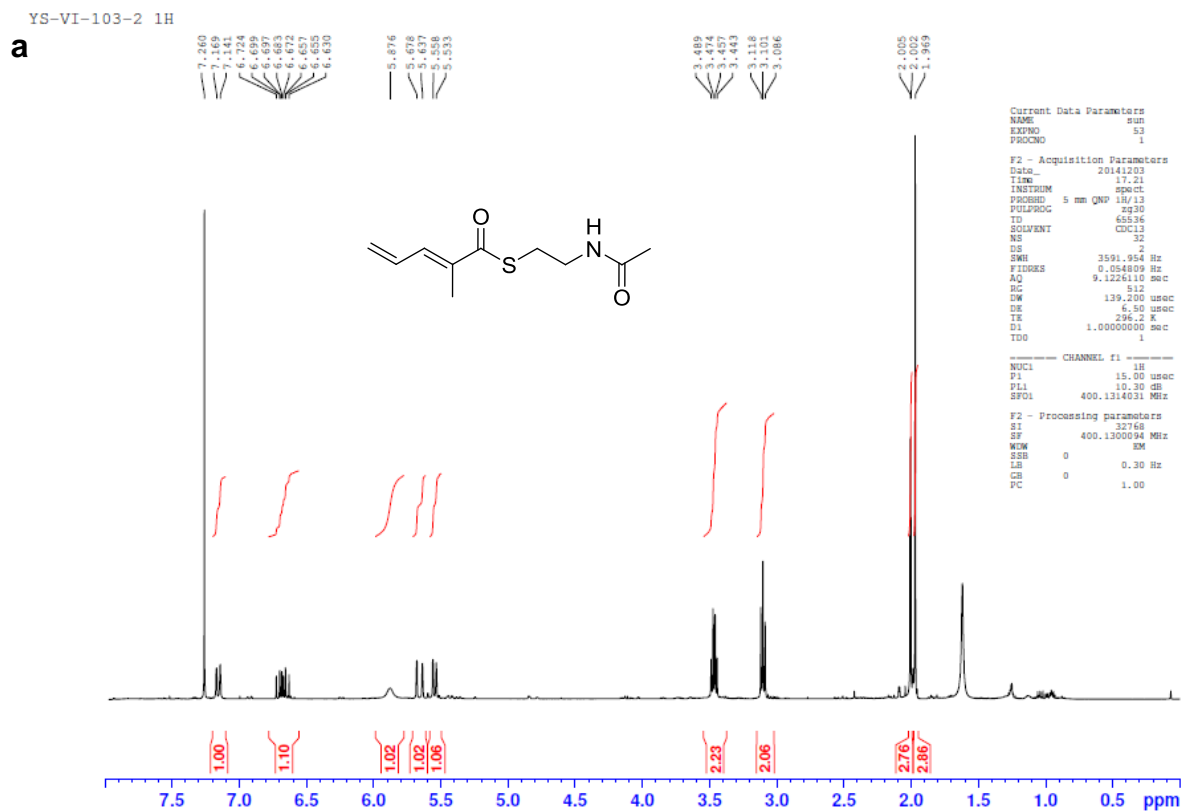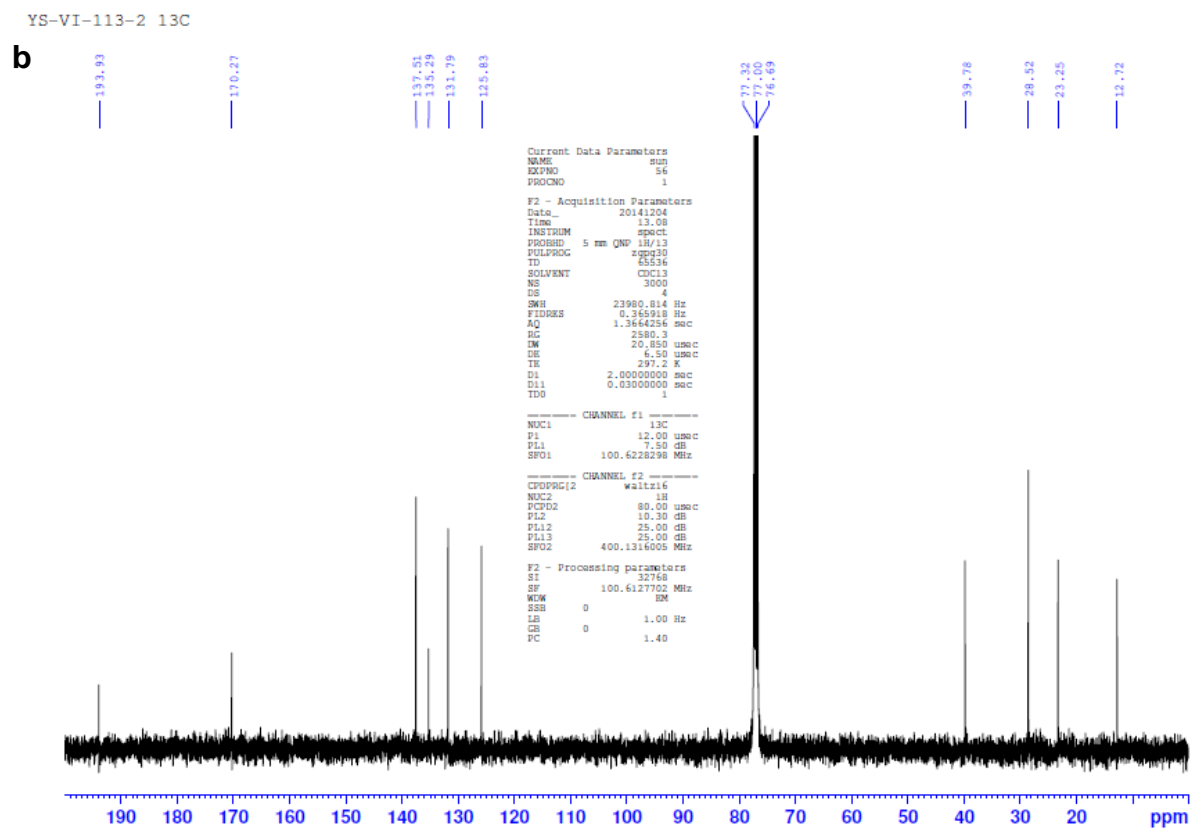

**Figure S25. NMR spectra of pent-2,4-dienoyl SNAC (3b).**

**a.**  $^1\text{H}$  NMR (400 MHz,  $\text{CDCl}_3$ ); **b.**  $^{13}\text{C}$  NMR (100 MHz,  $\text{CDCl}_3$ ).

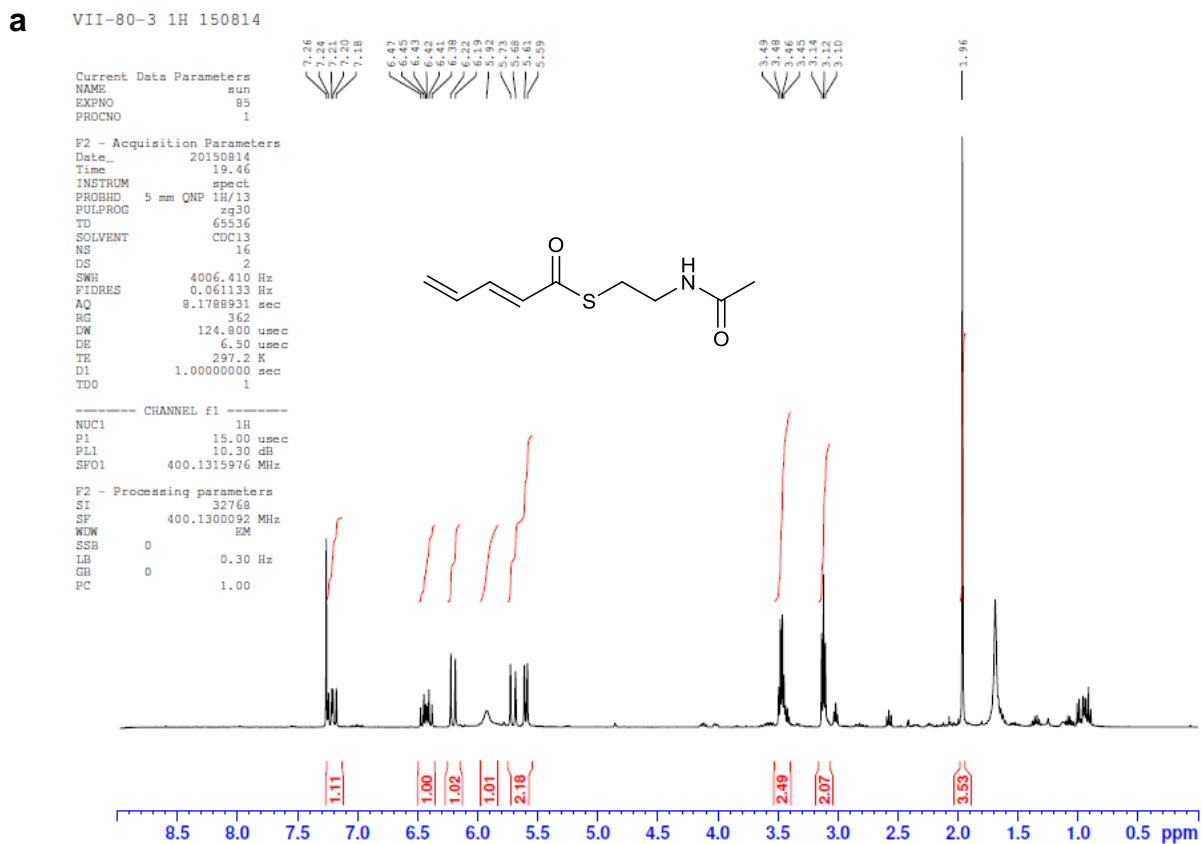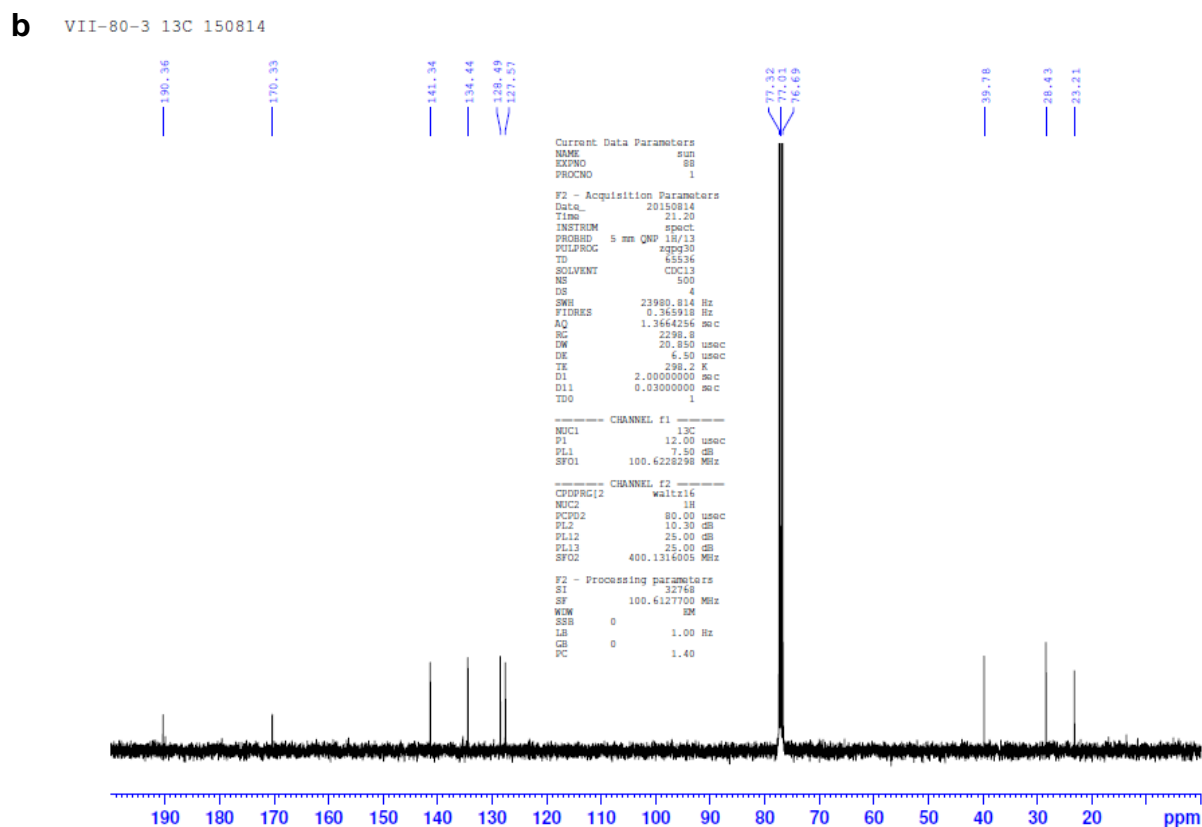

**Figure S26. Biological activities**

(a) Anti-oomycete (*Phytophthora capsici*)

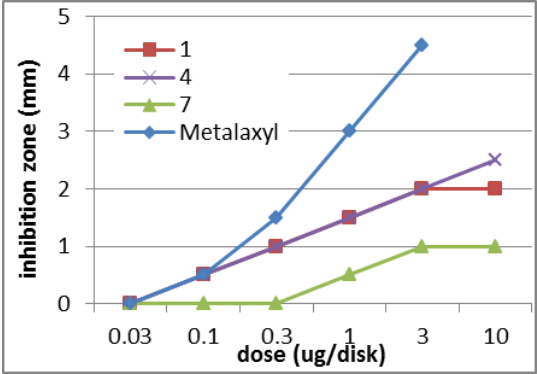

(b) Cytotoxicity (HeLa-S3 cells)

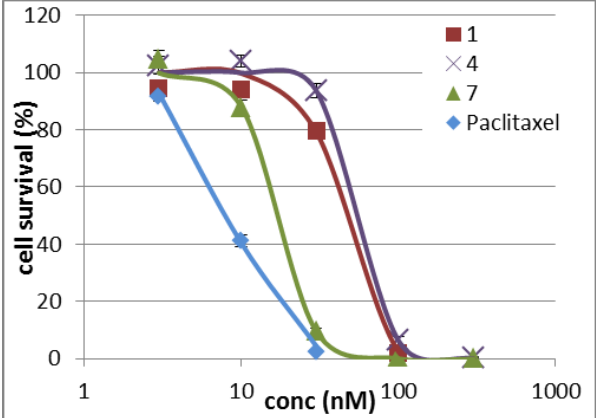

Markers indicate average values with SE, and lines indicate theoretical sigmoid curves.

## Supplementary Tables

**Table S1. PKS in *hli* for the biosynthesis of haliangicin skeleton.**

| Gene        | Protein | Length (aa) | Type       | Domain position                                                                                            |
|-------------|---------|-------------|------------|------------------------------------------------------------------------------------------------------------|
| <i>hliF</i> | HliF    | 1372        | Type I PKS | KS (36-458), AT (552-847), O-MT (942-1195), ACP (1280-1349)                                                |
| <i>hliG</i> | HliG    | 1966        | Type I PKS | KS (37-460), AT (594-896), DH (979-1145), KR (1544-1722), ACP (1834-1899)                                  |
| <i>hliP</i> | HliP    | 2890        | Type I PKS | KS (12-449), ACP (850-923), KS (953-1380), AT (1498-1804), DH (1874-2042), KR (2431-2623), ACP (2733-2803) |
| <i>hliT</i> | HliT    | 2225        | Type I PKS | KS (36-459), AT (564-853), DH (927-1092), ER (1501-1808), KR (1832-2010), ACP (2111-2181)                  |

**Table S2.  $\beta$ -methyl branching cassette in *hli* and its homology.**

| Product                        | KS                 | ACP        | HCS        | ECH  | ECH  | AT     | Tandem ACP   | Origin                | HCS identity to HliM <sup>*4</sup> |
|--------------------------------|--------------------|------------|------------|------|------|--------|--------------|-----------------------|------------------------------------|
| haliangicin                    | HliL <sup>*1</sup> | HliN       | HliM       | HliO | HliC | HliL   | -            | <i>H. ochraceum</i>   | 100%                               |
| crocacin <sup>11</sup>         | CroD <sup>*1</sup> | CroH       | CroE       | CroF | CroG | CroD   | -            | <i>C. crocatus</i>    | 50%                                |
| virginiamycin M <sup>12</sup>  | VirB               | *2         | VirC       | VirD | VirE | VirI   | VirA         | <i>S. virginiae</i>   | 37%                                |
| myxovirescin <sup>2</sup>      | TaK                | TaB<br>TaE | TaC<br>TaF | TaX  | TaY  | TaV    | -            | <i>M. xanthus</i>     | 34%<br>35%                         |
| corallopyronin A <sup>13</sup> | CorD               | CorC       | CorE       | CorF | CorG | CorA   | CorJ/K<br>/L | <i>C. coralloides</i> | 34%                                |
| mupirocin <sup>14</sup>        | MupG               | Macp1<br>5 | MupH       | MupJ | MupK | MmpIII | Mmpl         | <i>P. fluorescens</i> | 34%                                |
| batumin <sup>15</sup>          | BatB               | BatA       | BatC       | BatD | BatE | BatH   | Bat2         | <i>P. fluorescens</i> | 34%                                |

\*1 KS domains does not feature the cysteine-to-serine mutation in typical KS<sup>S</sup>

\*2 An ACP-encoding orf can be found between *virA* and *virB* but did not present in the original report

**Table S3. Methoxymalony-ACP cassette in *hli* and its homology.**

|                                                   | HliQ        | HliH              | HliI                   | HliJ       | HliK                            |
|---------------------------------------------------|-------------|-------------------|------------------------|------------|---------------------------------|
| Proposed function                                 | AT-ACP-O-MT | FkbH-like protein | Acyl-CoA dehydrogenase | ACP        | 3-hydroxyacyl-CoA dehydrogenase |
| Identity to <i>pel</i> biosynthesis <sup>10</sup> | PeIG (48%)  | PeK (64%)         | PeIJ (57%)             | PeII (54%) | PeIH (66%)                      |
| Identity to <i>sor</i> biosynthesis <sup>6</sup>  | SorC (44%)  | -                 | SorE (55%)             | -          | SorD (59%)                      |
| Identity to <i>fkb</i> biosynthesis <sup>7</sup>  | FkbG (29%)  | FkbH (47%)        | Fkbl (35%)             | FkbJ (52%) | FkbK (38%)                      |

Accession: PeIG (CCE88382.1), PeIK (CCE88385.1), PeIJ (CCE88384.1), PeII (CCE88387.1), PeIH (CCE88386.1), SorC (AAK19884.1), SorE (AAK19892.1), SorD (AAK19885.1), FkbG (AAF86386.1), FkbH (AAF86387.1), Fkbl (AAF86388.1), FkbJ (AAF86389.1), FkbK (AAF86390.1).

**Table S4. Bacterial strains used in this study.**

| Bacterial strains         | Description                                                                                                                                                                                              | Source or reference     |
|---------------------------|----------------------------------------------------------------------------------------------------------------------------------------------------------------------------------------------------------|-------------------------|
| <i>E. coli</i>            |                                                                                                                                                                                                          |                         |
| TOPO 10                   | TOPO TA Cloning host                                                                                                                                                                                     | Invitrogen              |
| Mach 1                    | General cloning host                                                                                                                                                                                     | Invitrogen              |
| XL1-Blue                  | General cloning host                                                                                                                                                                                     | Stratagene              |
| Fusion-Blue               | Cloning host for In-fusion cloning                                                                                                                                                                       | Clontech                |
| SW105                     | $\lambda$ -Red recombineering host                                                                                                                                                                       | NCI, <sup>ref 16</sup>  |
| YM297                     | Cloning template of tetracycline resistance gene ( $tet^R$ )                                                                                                                                             | NBRP, <sup>ref 17</sup> |
| KRX                       | Expression host for recombinant proteins                                                                                                                                                                 | Promega                 |
| <i>M. xanthus</i>         |                                                                                                                                                                                                          |                         |
| ATCC25232                 | Wild type, heterologous host of haliangicin biosynthetic gene cluster                                                                                                                                    | Ajinomoto               |
| c7-6E TA-Kan <sup>R</sup> | Mutant harboring the sequence of c7-6E TA-Kan <sup>R</sup> (5' end of haliangicin biosynthetic gene cluster, from hliA to hliP) , Kan <sup>R</sup> , Thio <sup>R</sup>                                   | This study              |
| c10-11C-c7-6E             | Mutant harboring the entire haliangicin biosynthetic gene cluster, Kan <sup>R</sup> , Oxytet <sup>R</sup> , Thio <sup>R</sup> , haliangicin ( <b>1</b> ) producing                                       | This study              |
| $\Delta hliD$             | <i>hliD</i> disruptant, Kan <sup>R</sup> , Oxytet <sup>R</sup> , Thio <sup>R</sup> , Nrs <sup>R</sup> , 1-O-demethylhaliangicin ( <b>6</b> ), 1-O-demethyl-12,13-deoxyhaliangicin ( <b>5</b> ) producing | This study              |
| $\Delta hliR$             | <i>hliR</i> disruptant, Kan <sup>R</sup> , Oxytet <sup>R</sup> , Thio <sup>R</sup> , Nrs <sup>R</sup> , 14,15-dihydrohaliangicin ( <b>4</b> ) producing                                                  | This study              |
| $\Delta hliU$             | <i>hliU</i> disruptant, Kan <sup>R</sup> , Oxytet <sup>R</sup> , Thio <sup>R</sup> , Nrs <sup>R</sup> , 12,13-deoxyhaliangicin ( <b>7</b> ) producing                                                    | This study              |
| <i>H. ochraceum</i>       |                                                                                                                                                                                                          |                         |
| SMP-2                     | original haliangicin, haliangicin stereoisomer producer                                                                                                                                                  | Ajinomoto               |

**Table S5. Vectors used in this study.**

| Plasmids                           | Description                                                                                                        | Source or reference                    |
|------------------------------------|--------------------------------------------------------------------------------------------------------------------|----------------------------------------|
| General vectors                    |                                                                                                                    |                                        |
| pGEM-T easy vector                 | General TA cloning vector, Amp <sup>R</sup>                                                                        | Promega                                |
| pGEM-T vector                      | General TA cloning vector, Amp <sup>R</sup>                                                                        | Promega                                |
| pCR 2.1-TOPO                       | General TA cloning vector, Amp <sup>R</sup> , Kan <sup>R</sup>                                                     | Invitrogen                             |
| pHSG398                            | General cloning vector, Cm <sup>R</sup>                                                                            | Takara                                 |
| pET-32a                            | Expression vector for thioredoxin and His <sub>6</sub> -fusion recombinant protein, Amp <sup>R</sup>               | Novagen                                |
| pNR1                               | Cloning template of nourseothricin resistance gene, Nrs <sup>R</sup>                                               | ref 18                                 |
| pHSG398 Infu Nrs <sup>R</sup>      | General cloning vector for construction of disruption vector, pHSG398-derived, Nrs <sup>R</sup> under Tn5 promoter | This study                             |
| Disruption vectors                 |                                                                                                                    |                                        |
|                                    | Description                                                                                                        | Transformant                           |
| pHSG GemOMT4 Infu Nrs <sup>R</sup> | pHSG398 Infu Nrs <sup>R</sup> -derived, carrying internal fragment of <i>hliD</i> (522 bp), Nrs <sup>R</sup>       | <i>M. xanthus</i> $\Delta$ <i>hliD</i> |
| pHSG 18ACAD Infu Nrs <sup>R</sup>  | pHSG398 Infu Nrs <sup>R</sup> -derived, carrying internal fragment of <i>hliR</i> (715 bp), Nrs <sup>R</sup>       | <i>M. xanthus</i> $\Delta$ <i>hliR</i> |
| pHSG 21Ox Infu Nrs <sup>R</sup>    | pHSG398 Infu Nrs <sup>R</sup> -derived, carrying internal fragment of <i>hliU</i> (730 bp), Nrs <sup>R</sup>       | <i>M. xanthus</i> $\Delta$ <i>hliU</i> |
| Expression vectors                 |                                                                                                                    |                                        |
|                                    | Description                                                                                                        | Expressed protein                      |
| pET32a HliR                        | pET-32a-derived, expression vector for N-His <sub>6</sub> -fusion HliR, Amp <sup>R</sup>                           | HliR                                   |
| Other vectors                      |                                                                                                                    |                                        |
|                                    | Description                                                                                                        | Source                                 |
| pTA                                | pGEM-T easy vector-derived, carrying TA fragment (1.8 kb), Amp <sup>R</sup>                                        | This study                             |
| pTA-Kan <sup>R</sup>               | pTA-derived, carrying TA-Kan <sup>R</sup> fragment (2.7 kb), Kan <sup>R</sup> , Amp <sup>R</sup>                   | This study                             |
| pGem walking                       | pGEM-T vector-derived, carrying 7.4 kb fragment for gene walking, Amp <sup>R</sup>                                 | This study                             |
| Cosmids                            |                                                                                                                    |                                        |
|                                    | Description                                                                                                        | Source                                 |
| pDW103                             | <i>E. coli</i> / <i>Streptomyces</i> shuttle cosmid vector, Amp <sup>R</sup> , Thio <sup>R</sup>                   | ref 19                                 |
| c7-6E                              | pDW103-derived, harboring 5' side of haliangicin biosynthetic gene fragment, Amp <sup>R</sup> , Thio <sup>R</sup>  | This study                             |
| c7-6E TA-Kan <sup>R</sup>          | Modified c7-6E, harboring TA fragment, Kan <sup>R</sup> , Thio <sup>R</sup>                                        | This study                             |
| c10-11C                            | pDW103-derived, harboring 3' side of haliangicin biosynthetic gene fragment, Amp <sup>R</sup> , Thio <sup>R</sup>  | This study                             |
| c10-11C Tet <sup>R</sup>           | Modified c10-11C, Oxytet <sup>R</sup> , Thio <sup>R</sup>                                                          | This study                             |

**Table S6. Primers used in this study.**

| Primers           | Sequence (5' → 3')                                                                 |
|-------------------|------------------------------------------------------------------------------------|
| KS1UP             | MG[ ]GARGC[ ]HW[ ]SM[ ]ATGGAYCC[ ]CARCA[ ]MG                                       |
| KSD1              | GGRTC[ ]CC[ ]AR[ ]SW[ ]GT[ ]CC[ ]GT[ ]CCRTG                                        |
| DWF1              | GGCCGGGTCCCTCCGCCGCA CGGAG                                                         |
| DWR               | GACAGTCATAAGTGCGGCGACGATAG                                                         |
| blaF-TAf          | ATGGTTTCTTAGACGTCAGGTGGCACTTTTCGGGGAAATGTGCGCGGAACAGT<br>GAGAGGTTCCGGTGGT          |
| blaR-kan1         | GCTTAATCAGTGAGGCACCTATCTCAGCGATCTGTCTATTTTCGTTTCATCCTGCA<br>GGGCGCAAGGGCTGCTAA     |
| TAf               | AACAGTGAGAGGTTCCGGTGGT                                                             |
| TAr               | CTATCTGCTCGACCTTCACGGG                                                             |
| PstI-Kan1         | TCCCATATGGTCGACCTGCAGGGCGCAAGGGCTGCTA AAGG                                         |
| SpeI-Kan2         | AGATAGAATCACTAGTGCACCCAAGTATCTTCAGCA                                               |
| blaF-tetU         | ATGGTTTCTTAGACGTCAGGTGGCACTTTTCGGGGAAATGTGCGCGGAACGTT<br>GGAGCCGCATTATTTTCGC       |
| blaR-tetD         | GCTTAATCAGTGAGGCACCTATCTCAGCGATCTGTCTATTTTCGTTTCATCCAGGG<br>TCATTATATTTTCGGGAATAAC |
| ORF4-MT-f1        | ACACCTTCGAGATCACTGCG                                                               |
| ORF4-MT-r1        | GACCTACGACCTGTTTCTGC                                                               |
| pHSG18ACAD Infu-f | CCGGGGATCCTCTAGTGACATCTACGAGGCGTTTC                                                |
| pHSG18ACAD Infu-r | GGCCAGTGCCAAGCTGCGCCGAACACGTGATTGTT                                                |
| pHSG 21Ox Infu F  | CCGGGGATCCTCTAGTAGGGCGGAGCTGGAGATG                                                 |
| pHSG 21Ox Infu R  | GGCCAGTGCCAAGCTGAAGTGCCGACGATGATTGC                                                |
| HliR Exp Infu f   | GGCTGATATCGGATCCATGAGCGCAGATACAACCAAG                                              |
| HliR Exp Infu r   | GGTGGTGGTGCTCGATTCCATGTCGCTCGGTGTC                                                 |
| thioF             | TTTGCCAGAGAGCGACGACTTCC                                                            |
| tetU              | ACGTTGGATCCGCATTATTTTC GC                                                          |
| TAf-F             | GGTAGCGCCCCGACATGCCGA                                                              |
| HpaI-kan1         | GATATGTTAACTGCAGGGCGCAAGGGCTGCTAA                                                  |
| blaF              | ATGGTTTCTTAGACGTCAGG                                                               |
| TAr-R             | GTGAAGTGGGGCGGCTTCAT                                                               |
| 9-4F-SorDF        | TACTCGGAATGCATTTTCATG                                                              |
| 9-4F-SorDR        | GTCCGGAAAGTTGTGCGAGAT                                                              |
| HMG-Syn Up        | TCGCCGAGCAAGCTCAGCAGCGACA                                                          |
| HMG-syn D         | ATGCTGACGGCGGCG TTGCGCGAGGA                                                        |
| HKS4NU            | GTCGACCGCTTCGATCCCTTTCCGTTTCGC                                                     |
| HKS4ND            | GGCCATTCTGATTG ACGGACGAACCGCGCA                                                    |
| 1011R-U           | CCGACGTTGCCGCCAGGACCTG                                                             |
| 1011R-D           | TCATCGACGGCCTGTTGCGCGTG                                                            |
| 7-6ENF-F          | CTTGGTCT CATCACTCGCGACTGC                                                          |
| 7-6ENF-R          | GCGCTCGCGTTGCGTCTCTGATG                                                            |
| pHSG398 Inverse-F | CCCTTAAACGCCTGGTGCTA                                                               |
| pHSG398 Inverse-R | GGAACCTCTTACGTGCCGAT                                                               |
| Kan Nrs-f         | GCTATGACTGGGCACCCCTTTCTCCTGGAAGACT                                                 |
| Amp Nrs-r         | GATACGGG AGGGCTTACATCCACGGGACTTGAGAC                                               |
| M13f(-47)         | CGCCAGGGTTTTCCAGTCACGAC                                                            |
| M13r(-48)         | AGCGGATAACAATTCACACAGGA                                                            |
| ORF18ACAD-Out f   | ATCTTCGCAATCAGCAGGA                                                                |
| ORF18ACAD-Out r   | GACGTTTGTCCGCTTTTCGAT                                                              |
| ORF4-MT-Ex-f1     | ATGTCTGGCAAGAGCAGGTC                                                               |
| ORF4-MT-Ex-r1     | TCATGCGACTGGACGAACAA                                                               |
| ORF21Ox-Out F2    | GAGCATCTCGGGACTTACGC                                                               |
| ORF21Ox-Out R     | GCTGGGGGTCATAGAGAAGG                                                               |



**Table S7. Analysis of end sequences of five cosmids that contain KS domains.**

| cosmids | primers | Top-hit homology of the translated end sequence                                   | Similarity/Identity |
|---------|---------|-----------------------------------------------------------------------------------|---------------------|
| c3-5F   | forward | ubiquinone biosynthesis protein [uncultured archaeon GZfos27G5]                   | 46%/31%             |
|         | reverse | $\beta$ -ketoacyl synthase, PpsD [ <i>Mycobacterium ulcerans</i> Agy99]           | 74%/62%             |
| c4-6B   | forward | protein kinase [ <i>Sorangium cellulosum</i> So ce 56]                            | 53%/40%             |
|         | reverse | 3-hydroxy-3-methylglutaryl-CoA synthase [ <i>Nostoc punctiforme</i> PCC 73102]    | 68%/50%             |
| c7-6E   | forward | StiF protein [ <i>Stigmatella aurantiaca</i> ]                                    | 46%/32%             |
|         | reverse | similar to hamlet CG31753-PA [ <i>Apis mellifera</i> ]                            | 39%/32%             |
| c9-4F   | forward | polysaccharide deacetylase [uncultured archaeon GZfos1D1]                         | 53%/35%             |
|         | reverse | 3-hydroxybutyryl-CoA dehydrogenase [ <i>Herpetosiphon aurantiacus</i> ATCC 23779] | 40%/33%             |
| c10-11C | forward | 3-hydroxybutyryl-CoA dehydrogenase [ <i>Herpetosiphon aurantiacus</i> ATCC 23779] | 85%/71%             |

**Table S8. NMR data for unnatural haliangicin analogs in CDCl<sub>3</sub>.**

| Position | 14,15-dihydrohaliangicin ( <b>4</b> )        |                     | 12,13-deoxyhaliangicin ( <b>7</b> )          |                     |
|----------|----------------------------------------------|---------------------|----------------------------------------------|---------------------|
|          | $\delta_{\text{H}}$ (mult, J in Hz)          | $\delta_{\text{C}}$ | $\delta_{\text{H}}$ (mult, J in Hz)          | $\delta_{\text{C}}$ |
| 1        | -                                            | 167.0               | -                                            | 167.1               |
| 2        | 5.25 (s)                                     | 95.7                | 5.25 (s)                                     | 95.7                |
| 3        | -                                            | 165.8               | -                                            | 165.9               |
| 4        | -                                            | 148.1               | -                                            | 148.0               |
| 5        | 5.78 (s)                                     | 112.2               | 5.80 (s)                                     | 112.5               |
| 6        | -                                            | 130.5               | -                                            | 130.1               |
| 7        | 6.03 (d, 11.2)                               | 126.3               | 6.04 (d, 11.2)                               | 126.5               |
| 8        | 6.11 (d, 11.2)                               | 120.3               | 6.09 (d, 12.0)                               | 120.3               |
| 9        | -                                            | 142.0               | -                                            | 142.5               |
| 10       | 2.33 (m)                                     | 40.4                | 2.41 (m)                                     | 41.5                |
| 11       | 1.21 (dd, 9.2, 13.6)<br>1.95 (dd, 6.0, 13.6) | 44.3                | 1.99 (dd, 8.4, 13.2)<br>2.18 (dd, 6.8, 13.6) | 46.0                |
| 12       | -                                            | 60.2                | -                                            | 138.2               |
| 13       | 2.68 (t, 6.4)                                | 65.1                | 5.81 (d, 10.4)                               | 127.0               |
| 14a      | 1.48 (m)                                     | 22.0                | 6.54 (td, 10.4, 16.8)                        | 133.4               |
| 14b      | 1.60 (m)                                     |                     |                                              |                     |
| 15       | 1.01 (t, 7.6)                                | 10.5                | 4.96 (dd, 1.6, 10.4)<br>5.07 (dd, 1.6, 16.8) | 114.6               |
| 1-OMe    | 3.67 (s)                                     | 51.2                | 3.68 (s)                                     | 51.3                |
| 3-OMe    | 3.72 (s)                                     | 56.0                | 3.73 (s)                                     | 56.0                |
| 4-OMe    | 3.55 (s)                                     | 57.2                | 3.55 (s)                                     | 57.2                |
| 6-Me     | 2.09 (s)                                     | 23.6                | 2.09 (s)                                     | 23.6                |
| 9-Me     | 1.69 (s)                                     | 13.5                | 1.70 (s)                                     | 13.4                |
| 10-Me    | 1.00 (d, 6.8)                                | 19.2                | 0.96 (d, 6.8)                                | 18.9                |
| 12-Me    | 1.23 (s)                                     | 16.6                | 1.73 (s)                                     | 16.5                |

## References

1. Sharan, S.K., Thomason, L.C., Kuznetsov, S.G. & Court, D.L. *Nat. Protoc.* **4**, 206-223 (2009).
2. Simunovic, V. et al. *Chembiochem* **7**, 1206-1220 (2006).
3. Yu, T.W. et al. *Proc. Natl. Acad. Sci. U. S. A.* **99**, 7968-7973 (2002).
4. Wenzel, S.C. et al. *J. Am. Chem. Soc.* **128**, 14325-14336 (2006).
5. Hill, A.M., Harris, J.P. & Siskos, A.P. *Chemical Communications*, 2361-2362 (1998).
6. Ligon, J. et al. *Gene* **285**, 257-267 (2002).
7. Wu, K., Chung, L., Revill, W.P., Katz, L. & Reeves, C.D. *Gene* **251**, 81-90 (2000).
8. Calderone, C.T. *Nat. Prod. Rep.* **25**, 845-853 (2008).
9. Muller, S. et al. *Chem. Biol.* **21**, 855-65 (2014).
10. Jahns, C. et al. *Angew. Chem.-Int. Edit.* **51**, 5239-5243 (2012).
11. Muller, S. et al. *Chem. Biol.* **21**, 855-865 (2014).
12. Pulsawat, N., Kitani, S. & Nihira, T. *Gene* **393**, 31-42 (2007).
13. Erol, O. et al. *Chembiochem* **11**, 1253-1265 (2010).
14. Gurney, R. & Thomas, C.M. *Appl. Microbiol. Biotechnol.* **90**, 11-21 (2011).
15. Mattheus, W. et al. *Chem. Biol.* **17**, 149-159 (2010).
16. Warming, S., Costantino, N., Court, D.L., Jenkins, N.A. & Copeland, N.G. *Nucleic Acids Res.* **33**, e36 (2005).
17. Yamazoe, M. et al. *Embo J.* **18**, 5873-5884 (1999).
18. Malonek, S., Rojas, M.C., Hedden, P., Hopkins, P. & Tudzynski, B. *Appl. Environ. Microbiol.* **71**, 6014-6025 (2005).
19. Hyun, C.G. et al. *FEMS Microbiol. Lett.* **183**, 183-189 (2000).
